# Supplementary material for: High-throughput surface marker screen on primary human breast tissues reveals further cellular heterogeneity
Source: Springer Nature journal article supplement (doi:10.1186/s13058-021-01444-5), 2021-06-13

Basal

Luminal Progenitor

Mature Luminal

Stromal

CD9

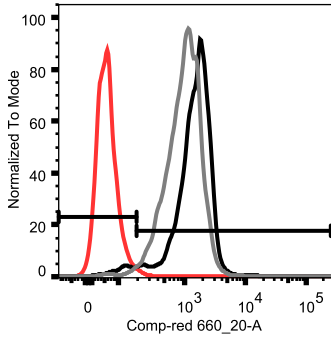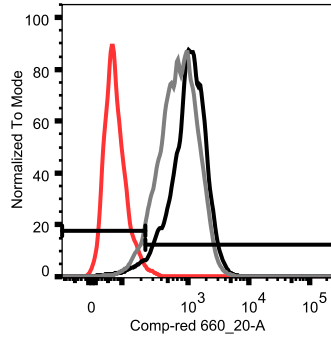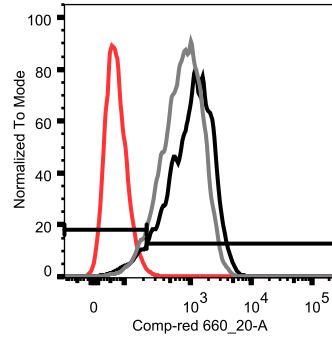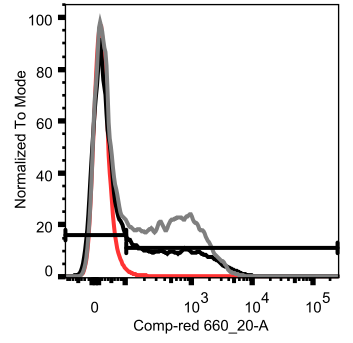

CD10

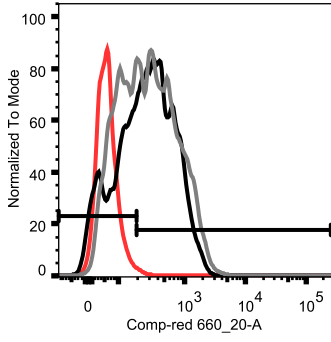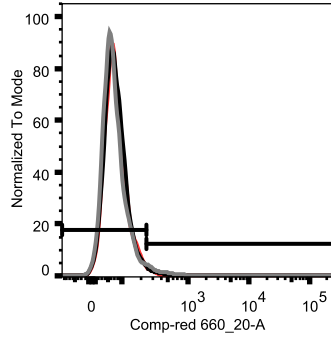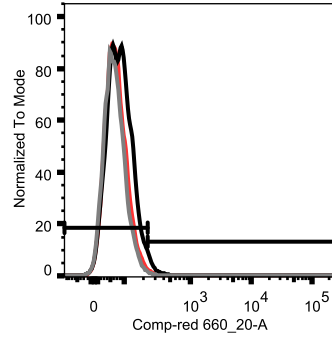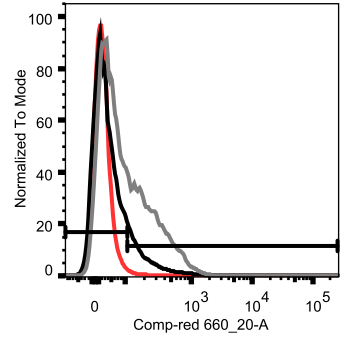

CD13

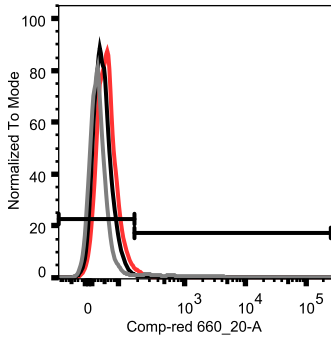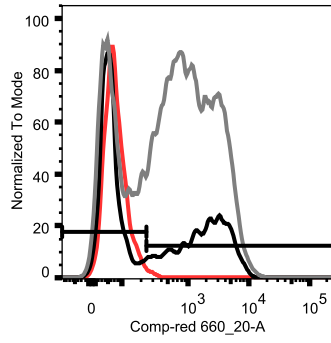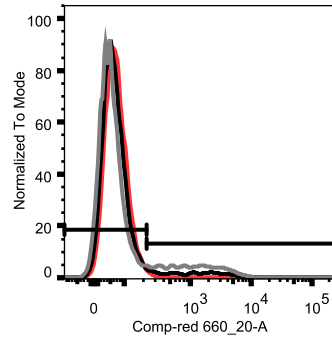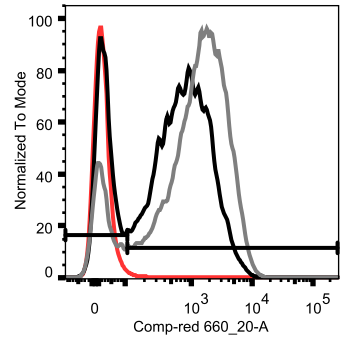

CD15

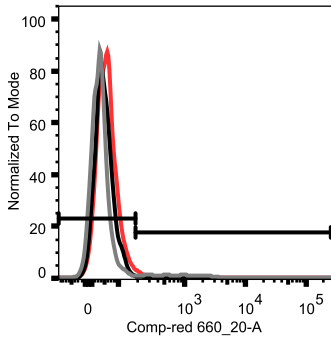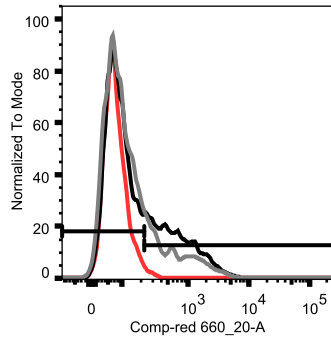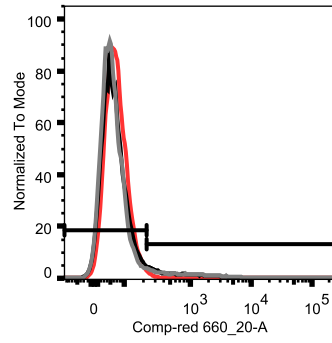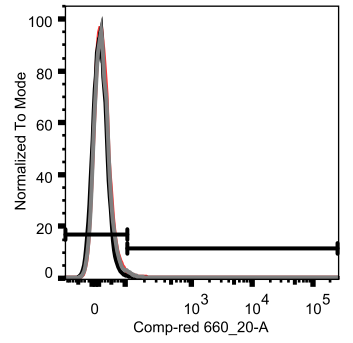

CD15s

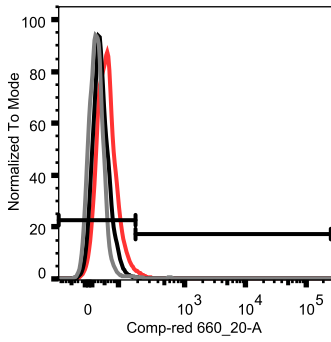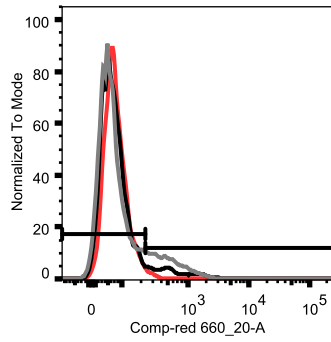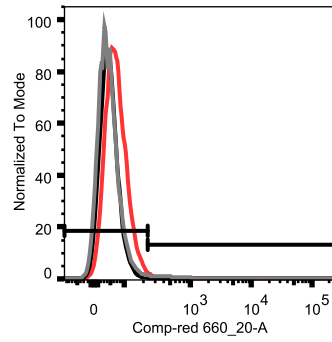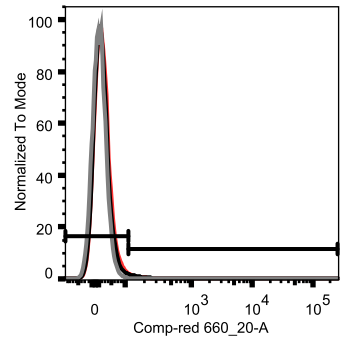

Basal

Luminal Progenitor

Mature Luminal

Stromal

CD18

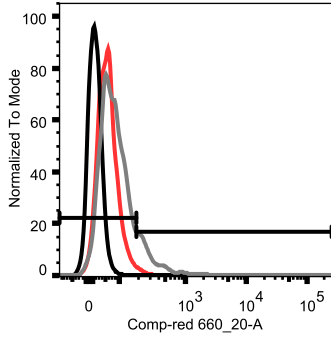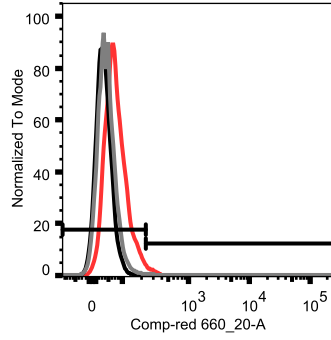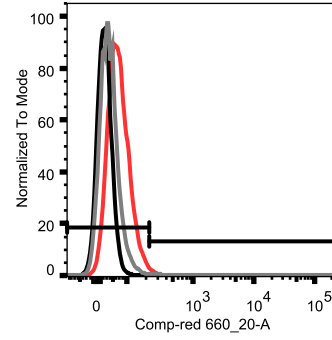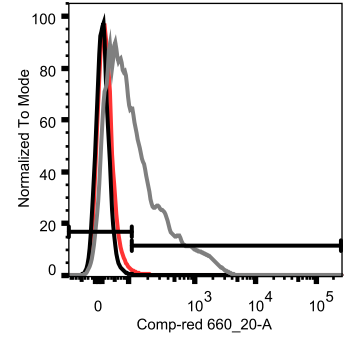

CD24

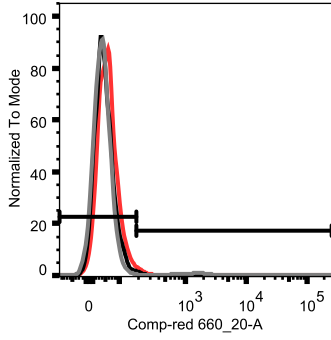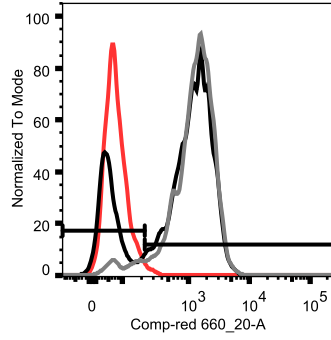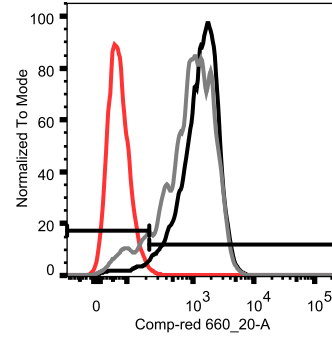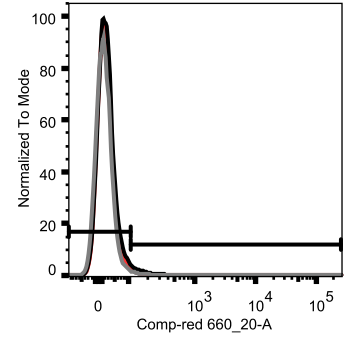

CD26

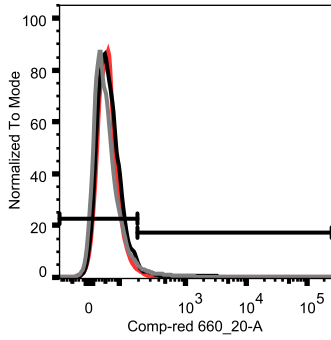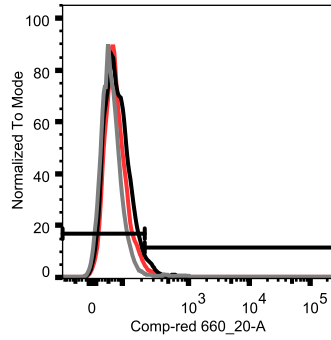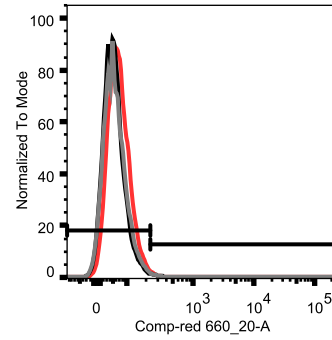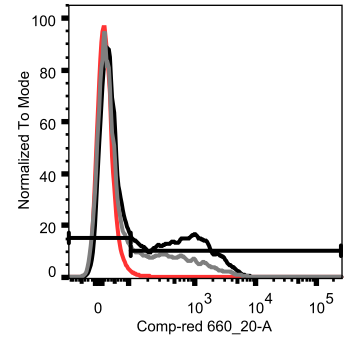

CD29

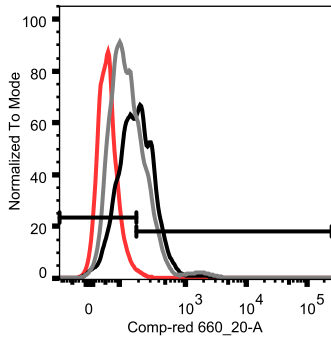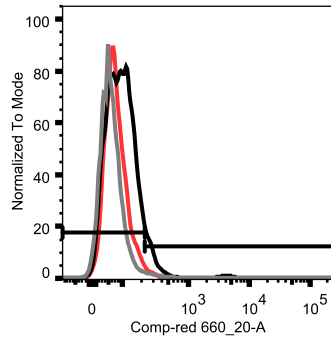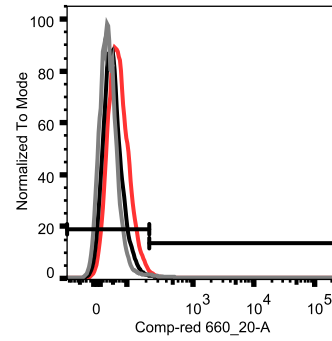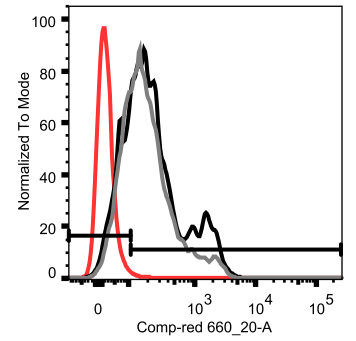

CD34

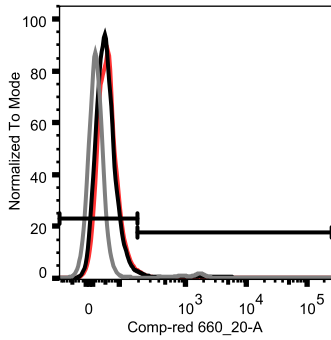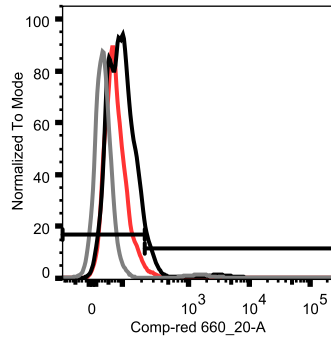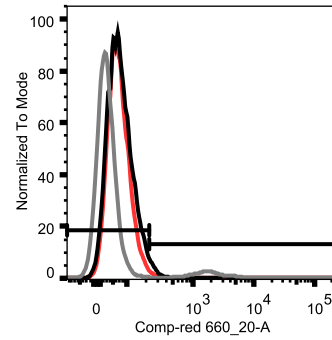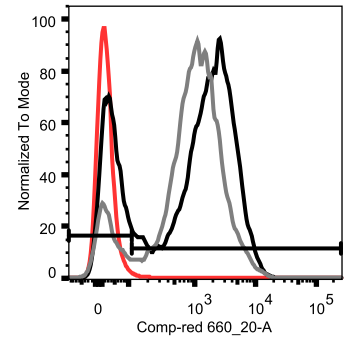

Basal

Luminal Progenitor

Mature Luminal

Stromal

CD36

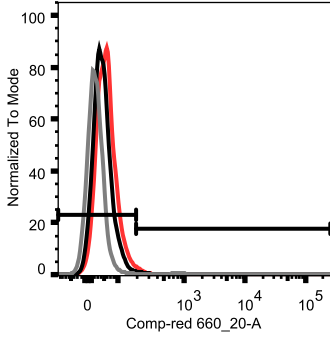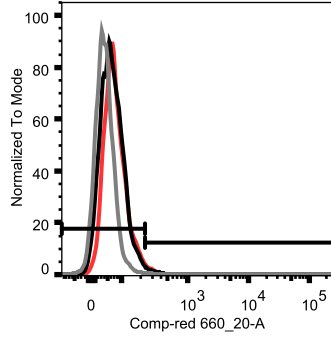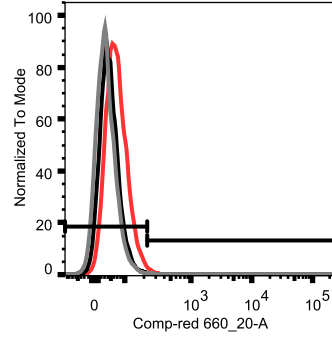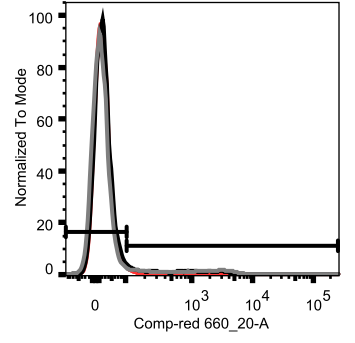

CD39

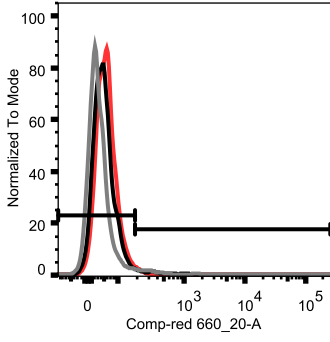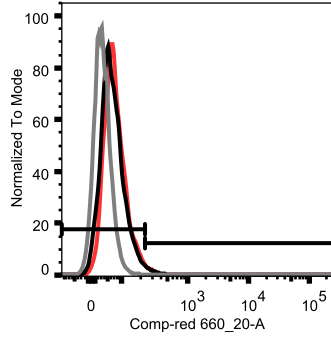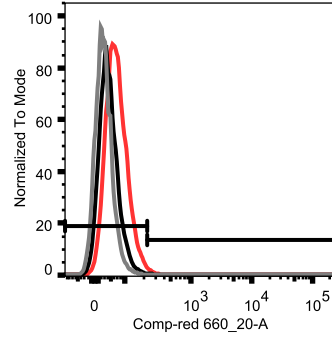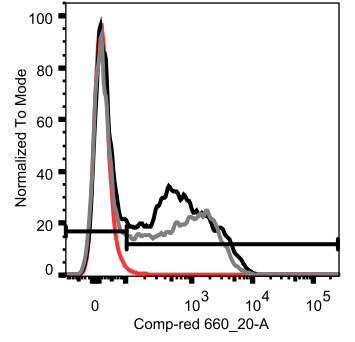

CD40

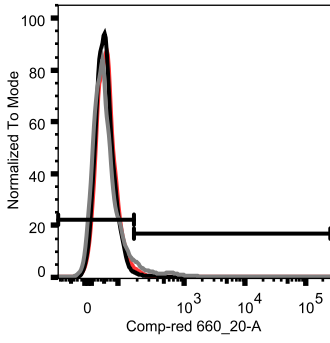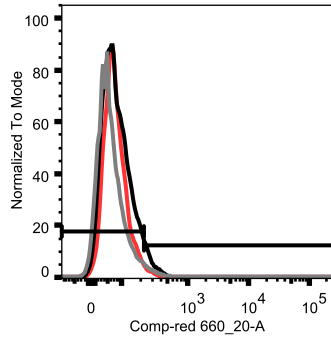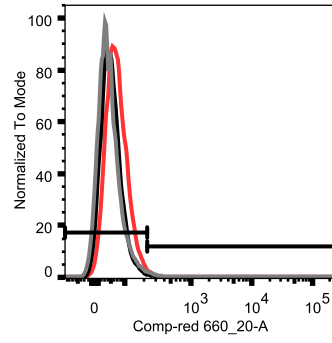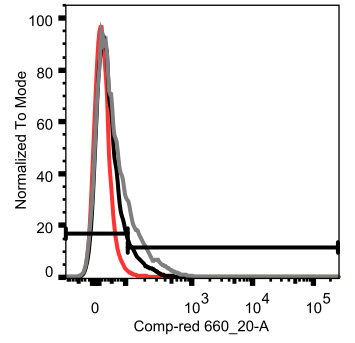

CD44

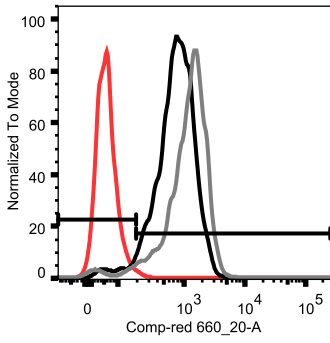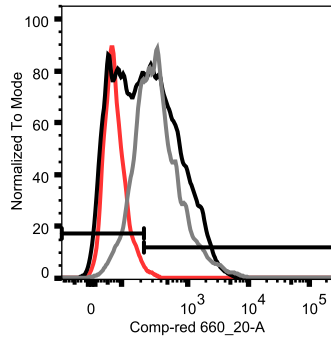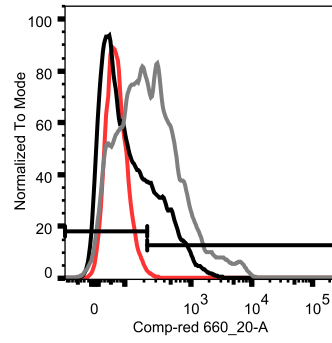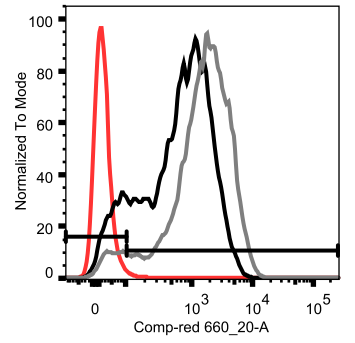

CD45

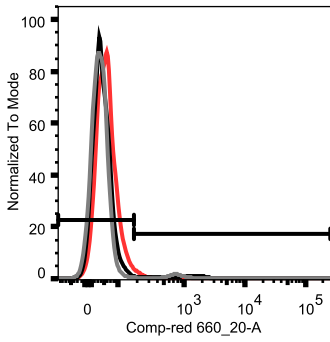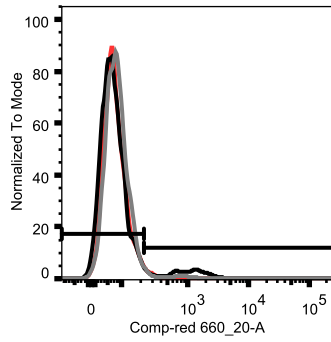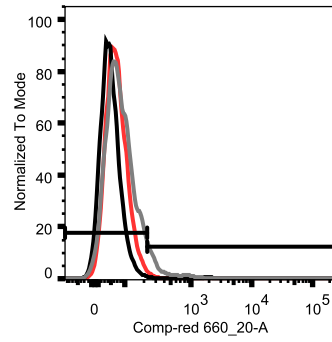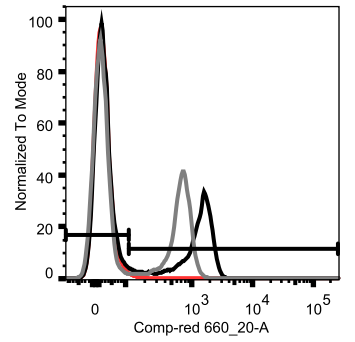

Basal

Luminal Progenitor

Mature Luminal

Stromal

CD46

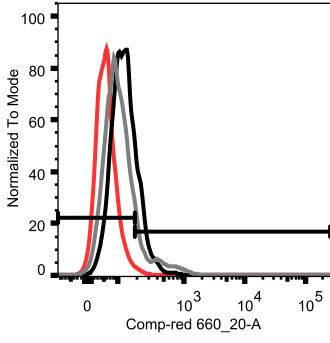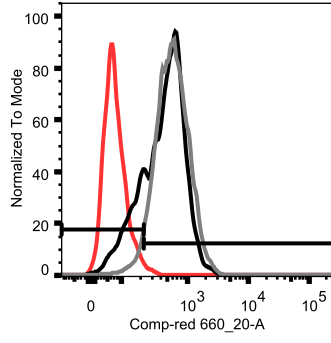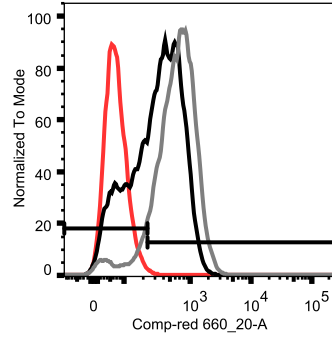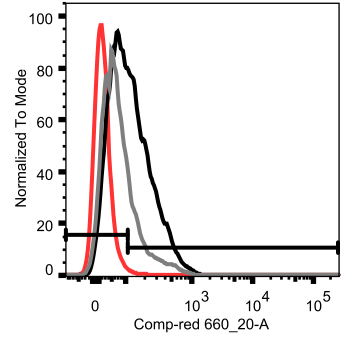

CD47

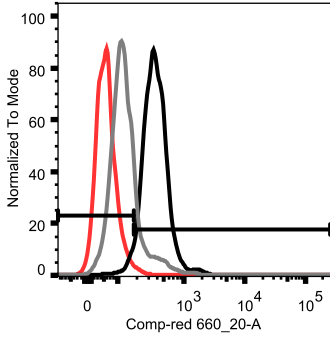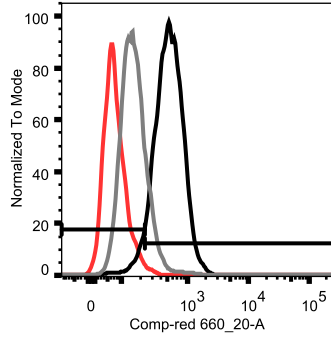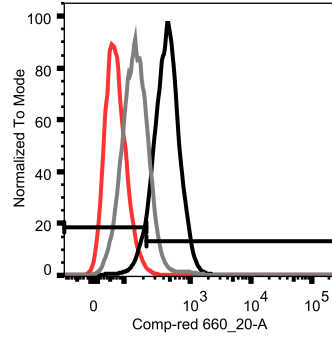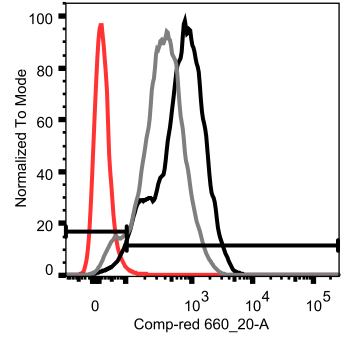

CD49a

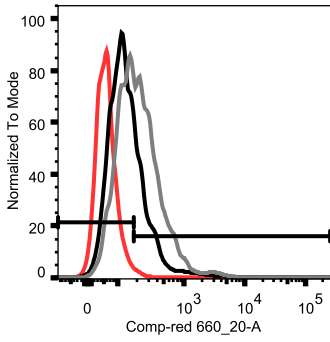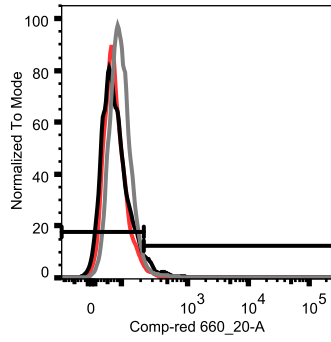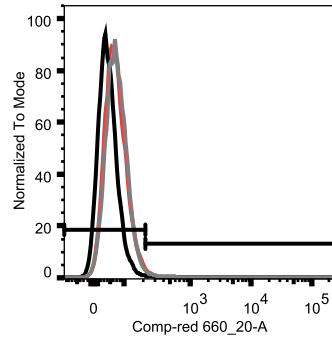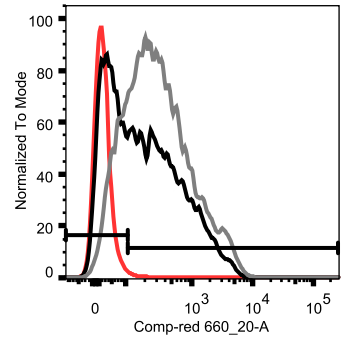

CD49b

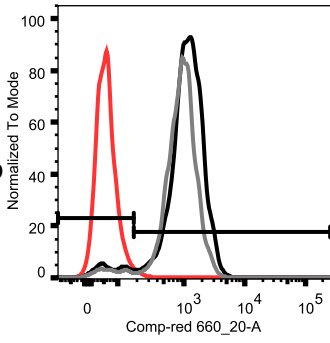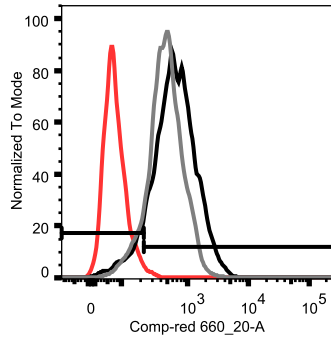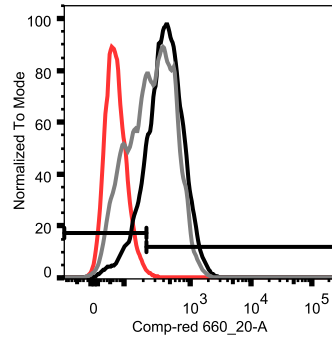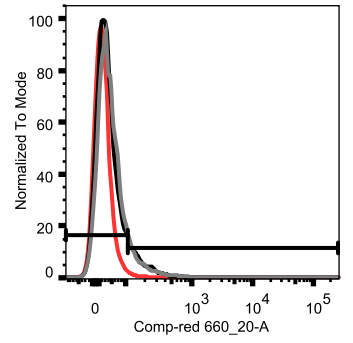

CD49c

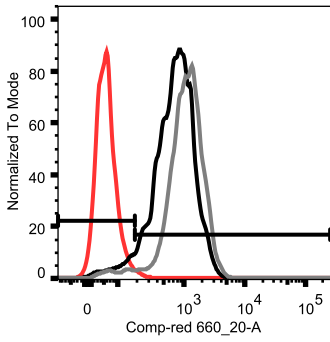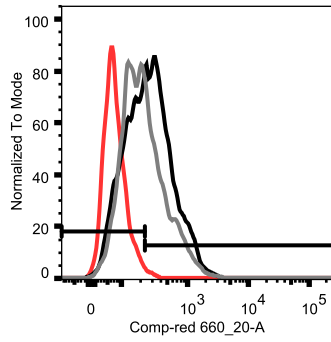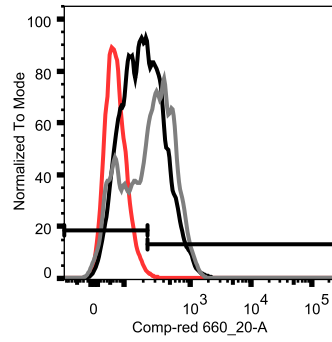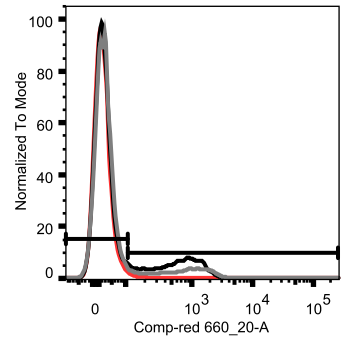

Basal

Luminal Progenitor

Mature Luminal

Stromal

CD49d

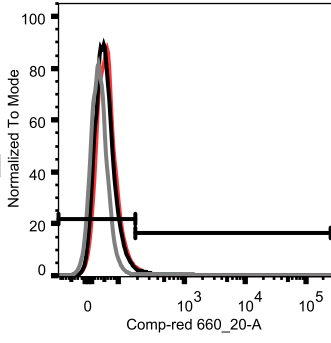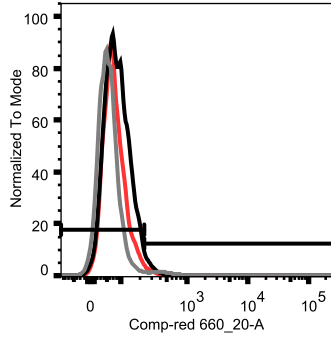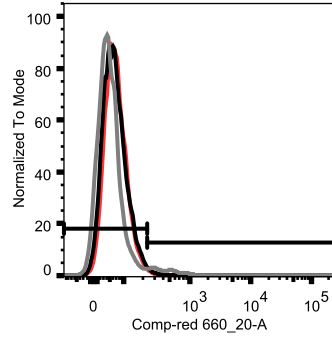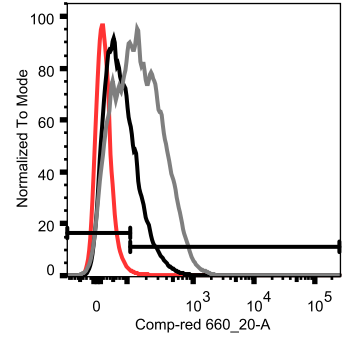

CD49e

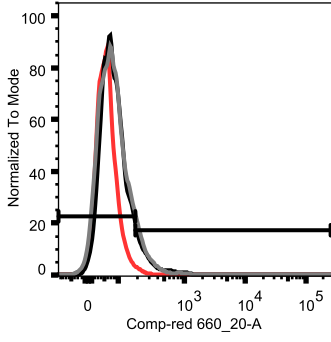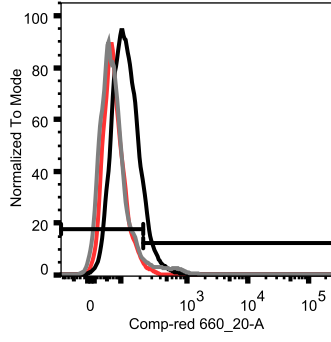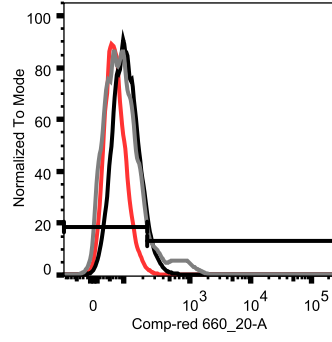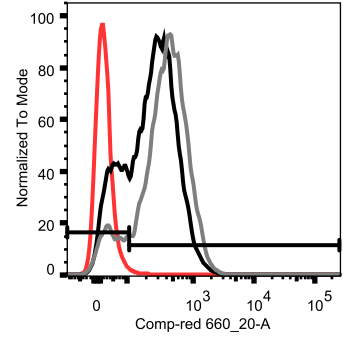

CD54

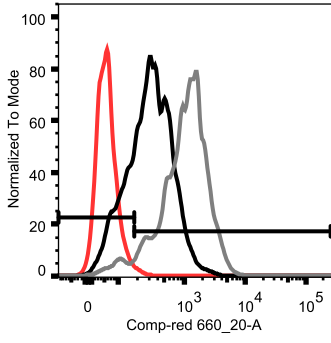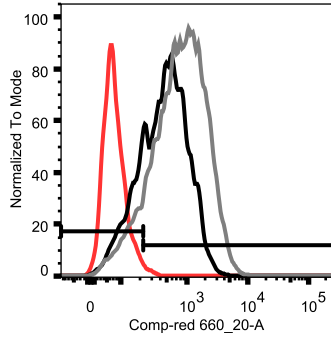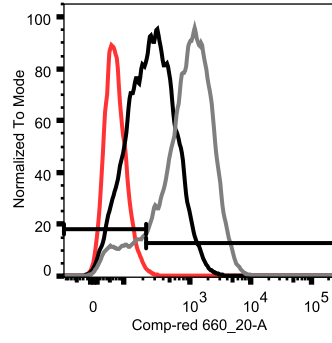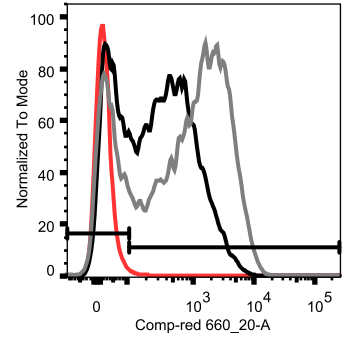

CD55

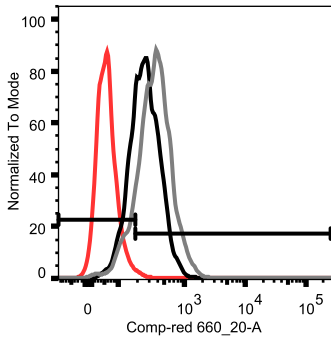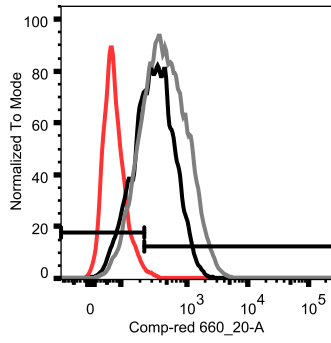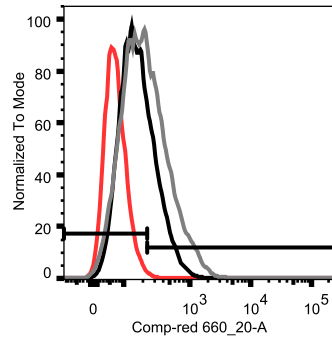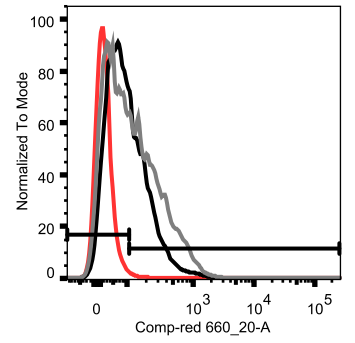

CD57

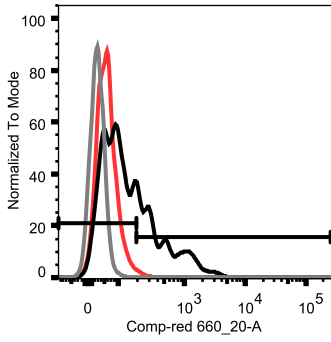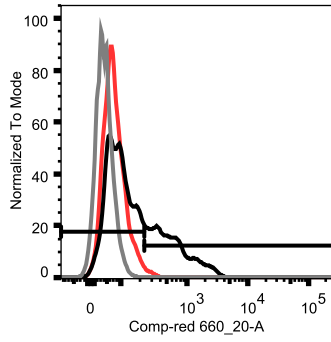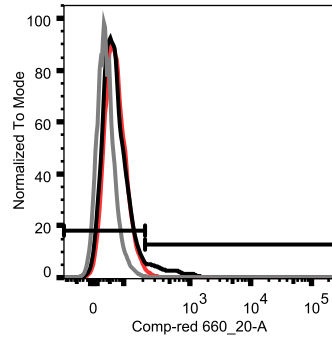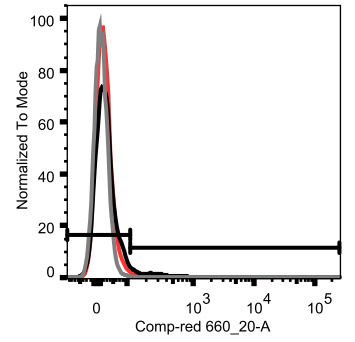

Basal

Luminal Progenitor

Mature Luminal

Stromal

CD58

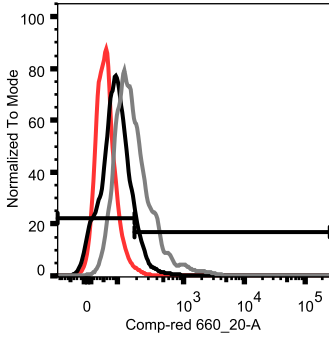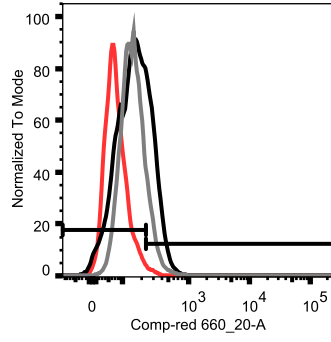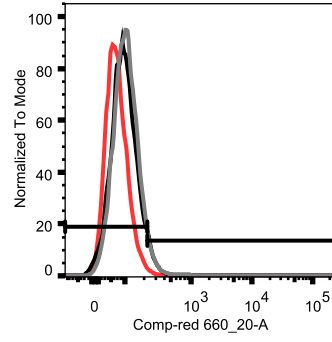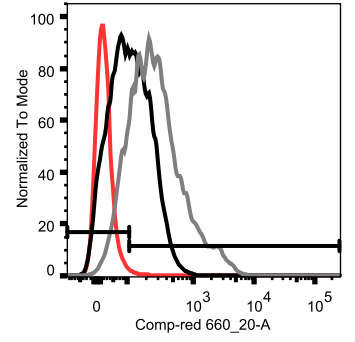

CD59

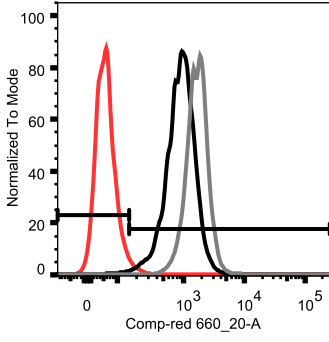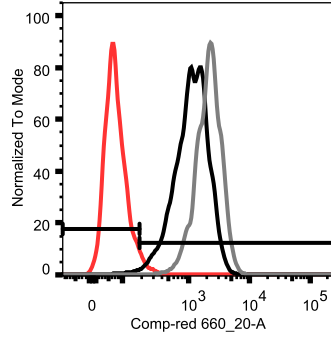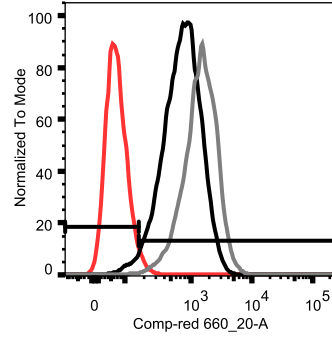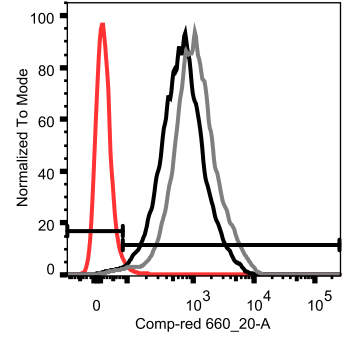

CD61

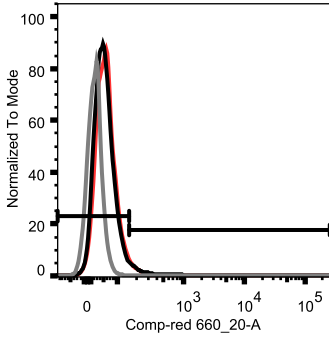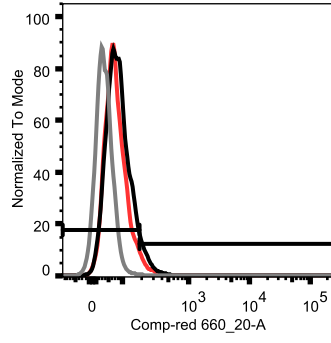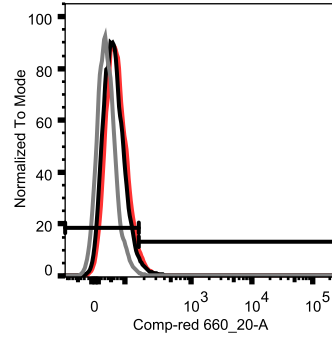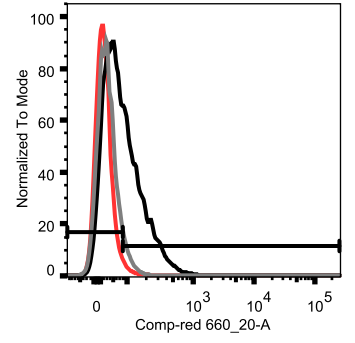

CD63

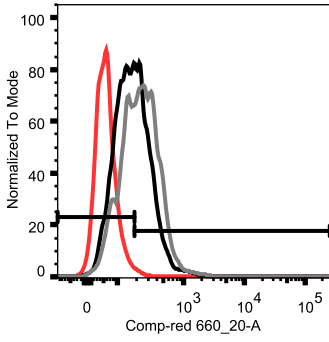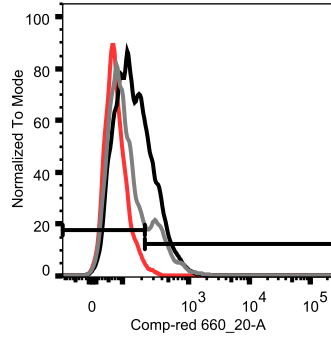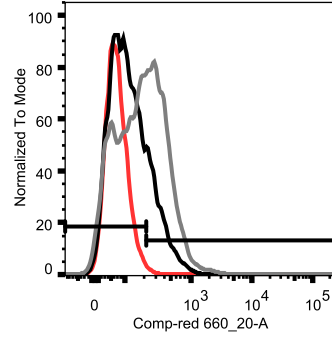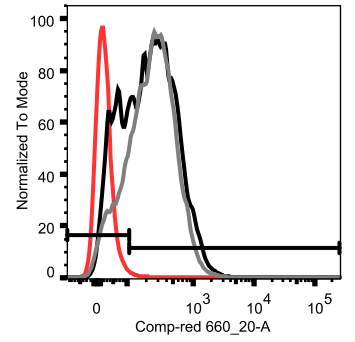

CD66

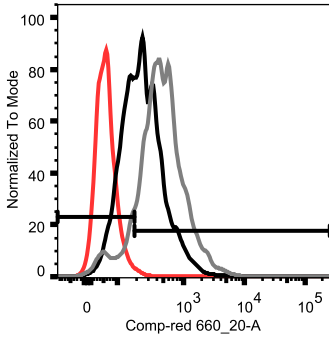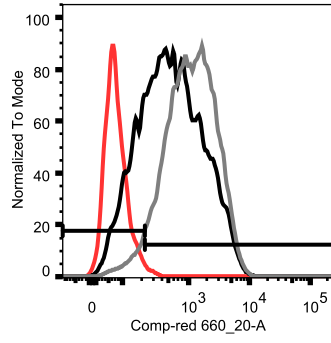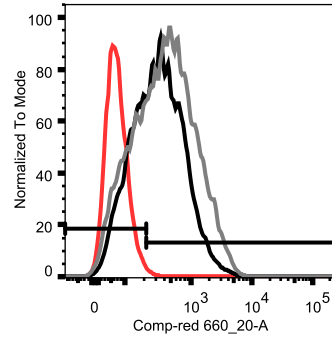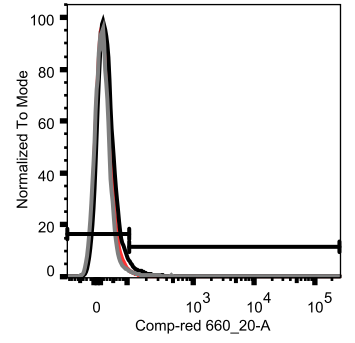

Basal

Luminal Progenitor

Mature Luminal

Stromal

CD69

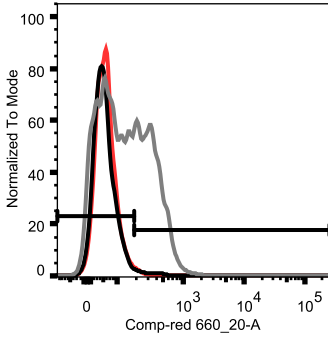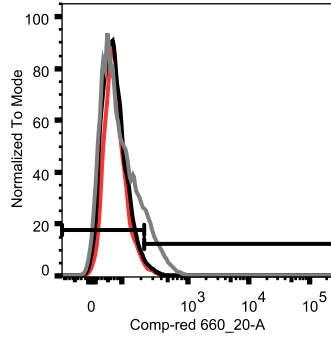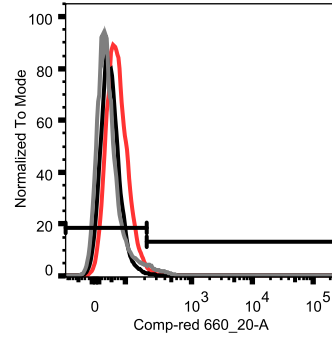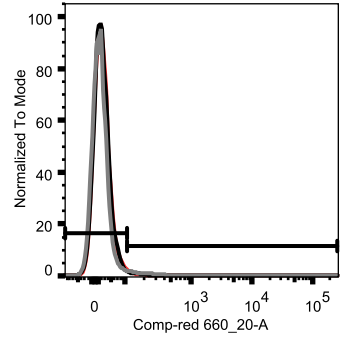

CD70

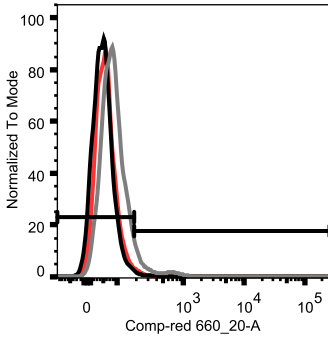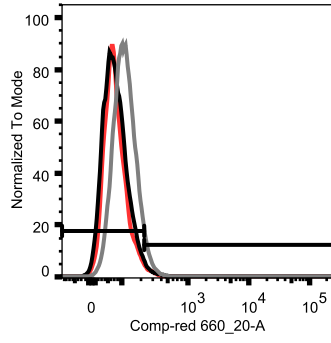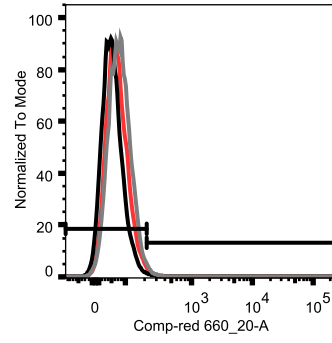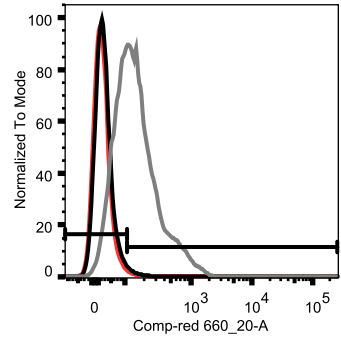

CD71

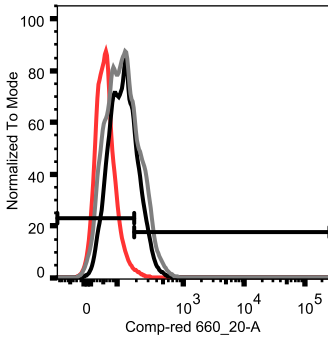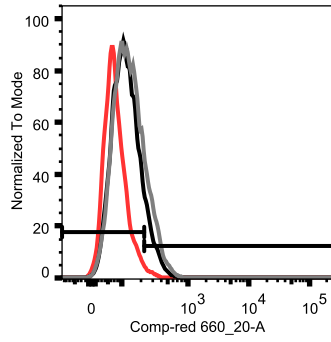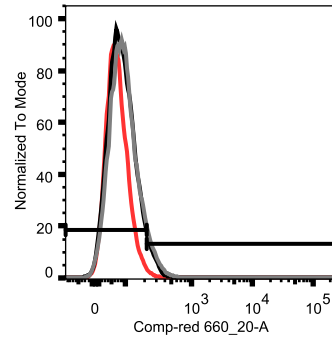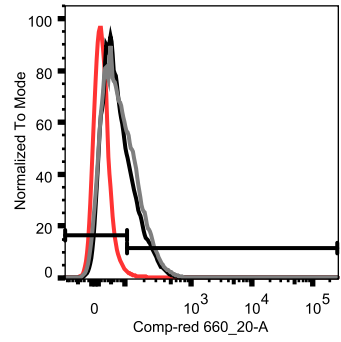

CD73

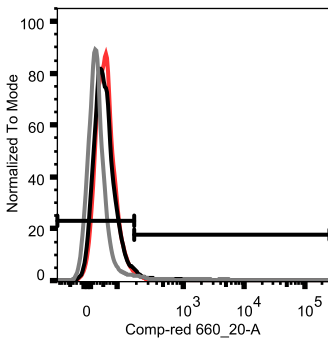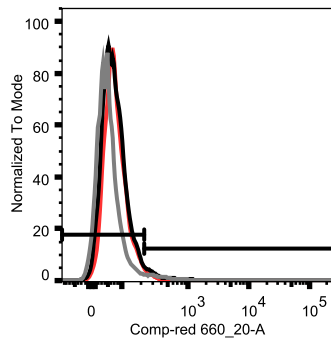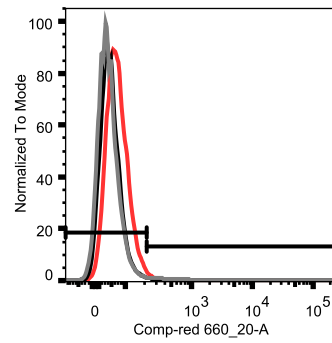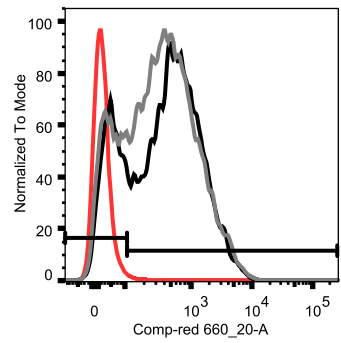

CD74

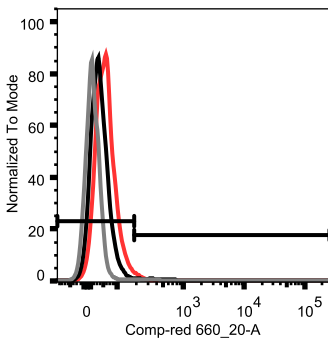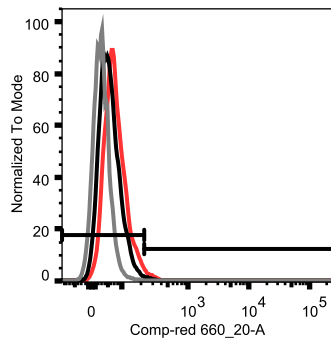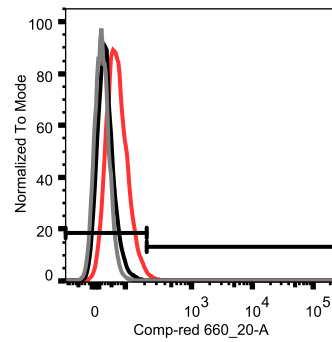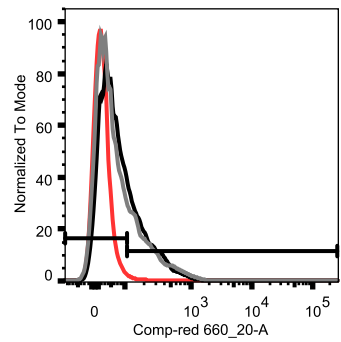

Basal

Luminal Progenitor

Mature Luminal

Stromal

CD75

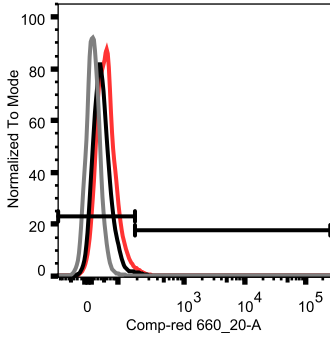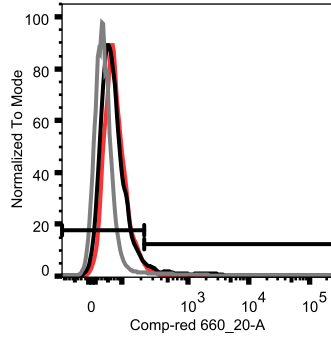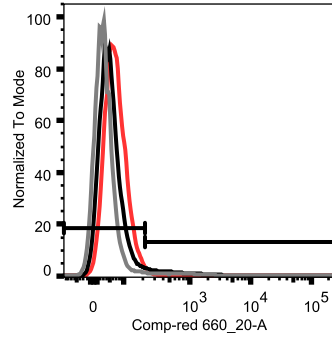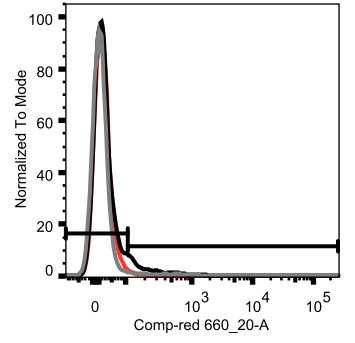

CD84

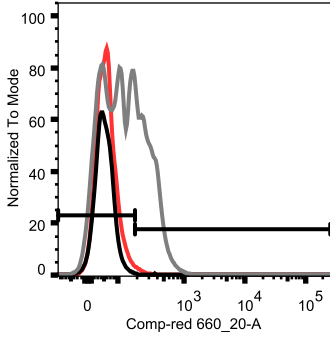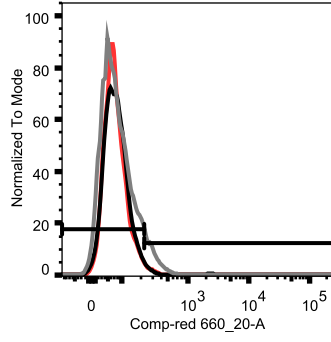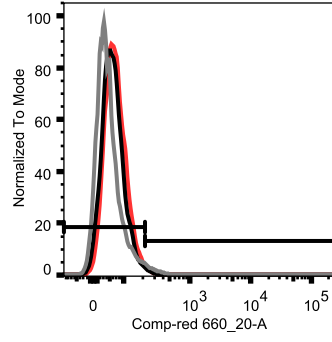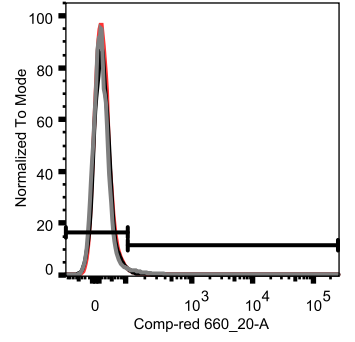

CD85

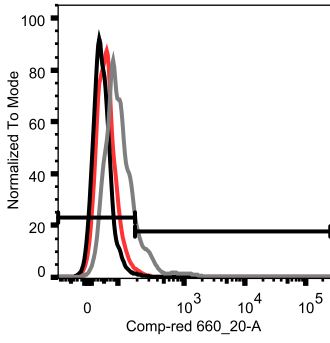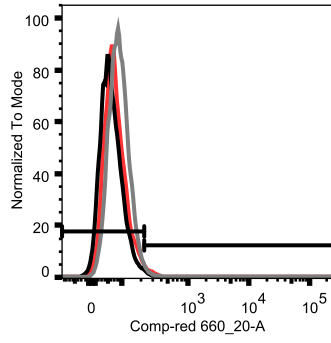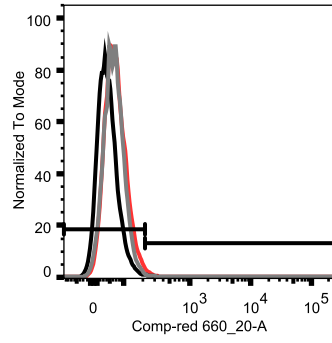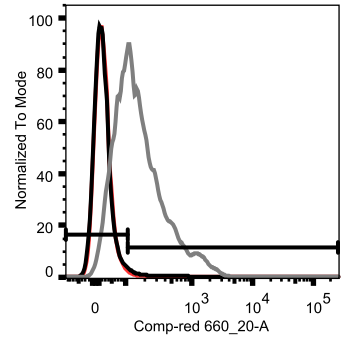

CD90

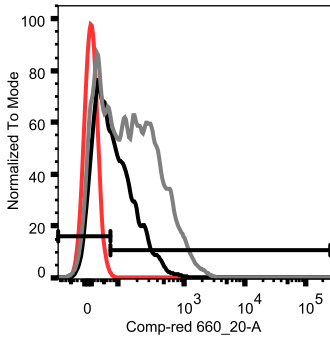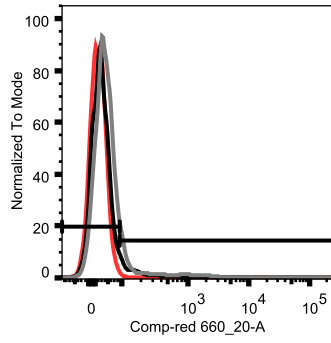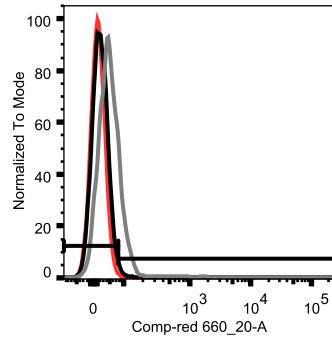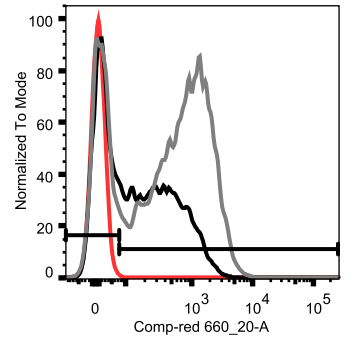

CD95

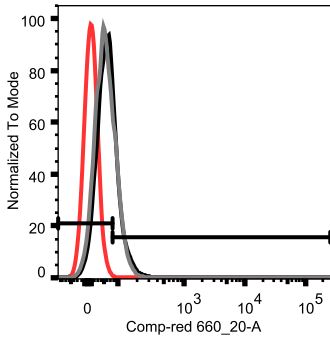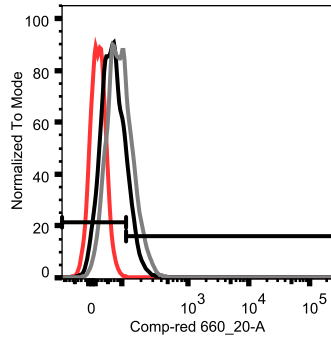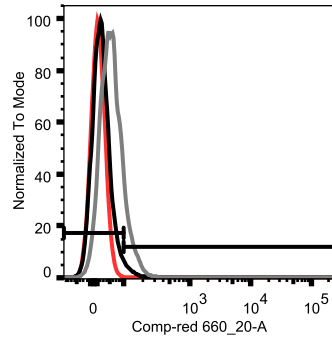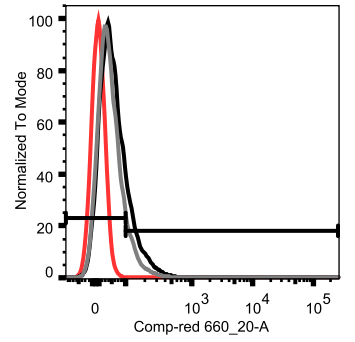



**Basal****Luminal Progenitor****Mature Luminal****Stromal****CD98**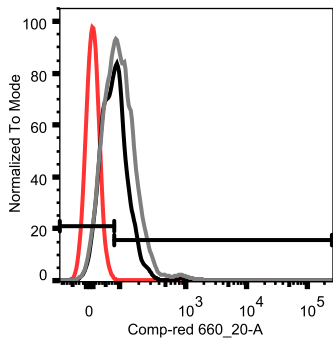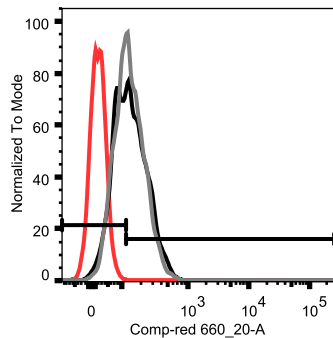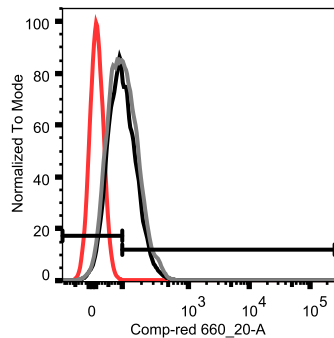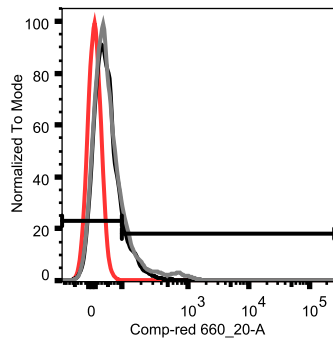**CD107a**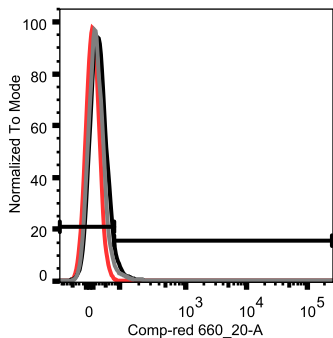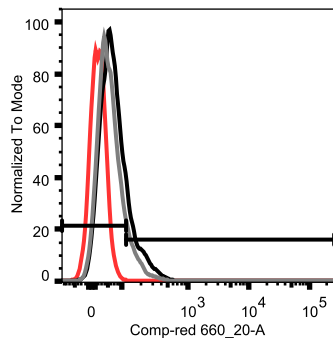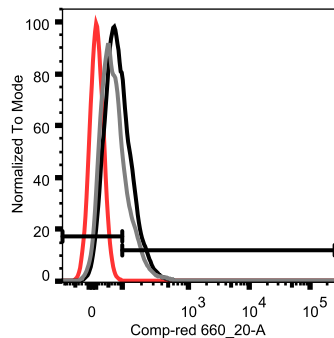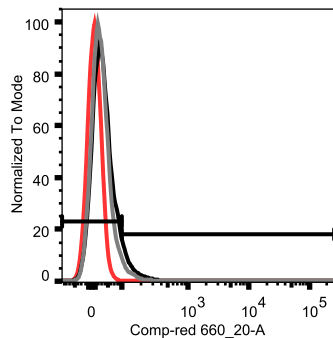**CD119**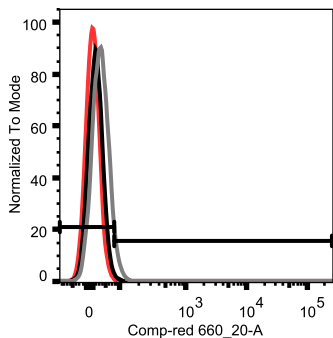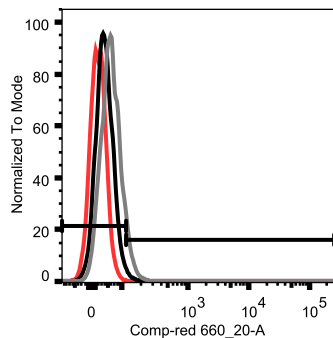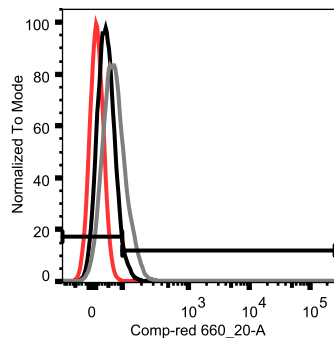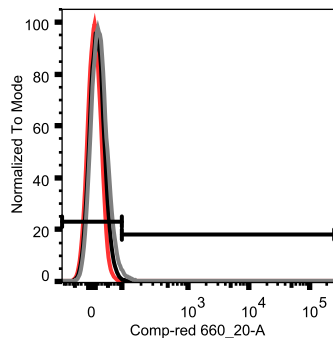**CD120a**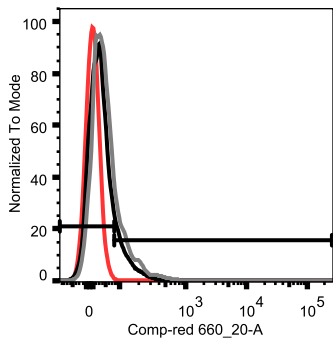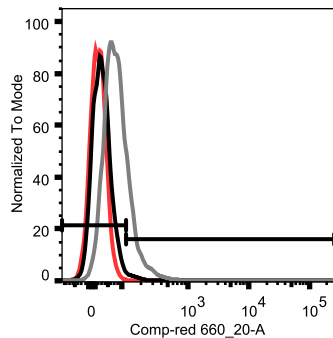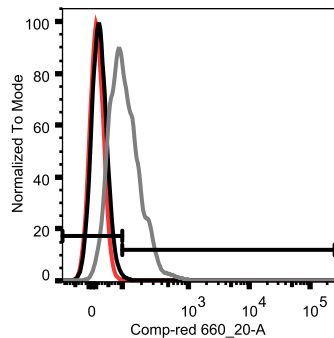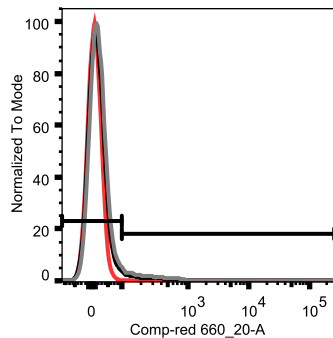**CD140b**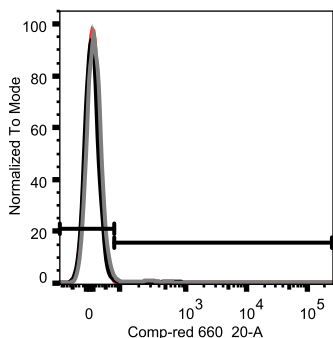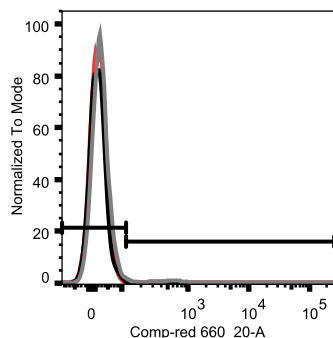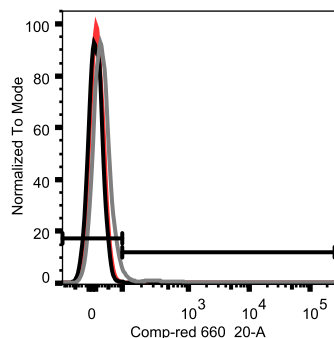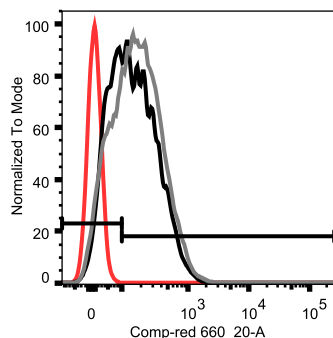

Basal

Luminal Progenitor

Mature Luminal

Stromal

CD141

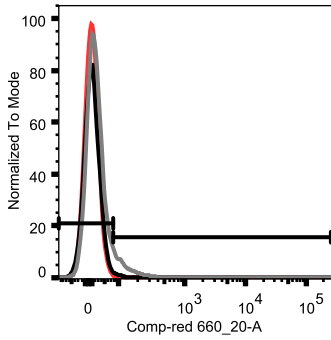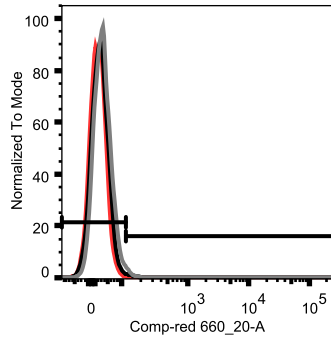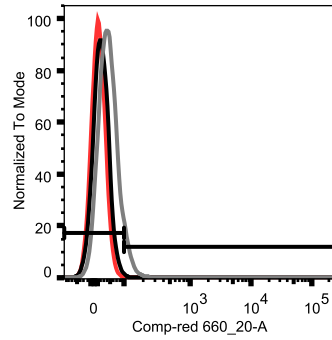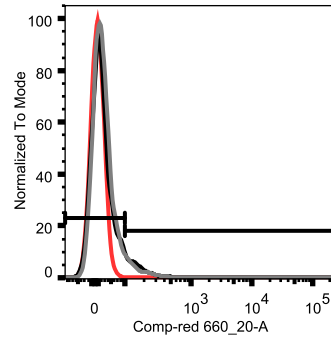

CD142

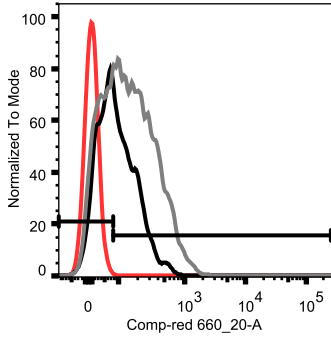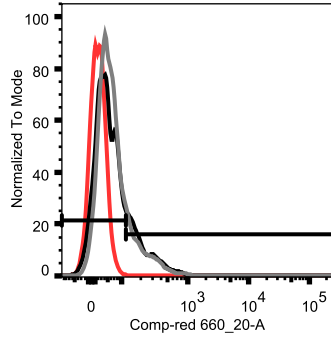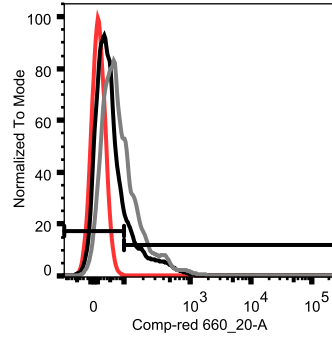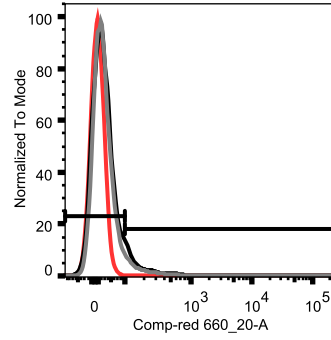

CD147

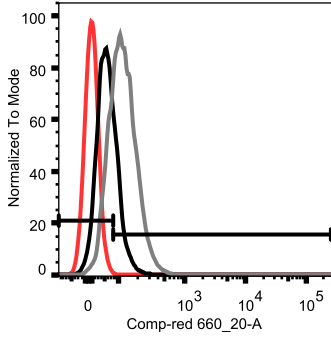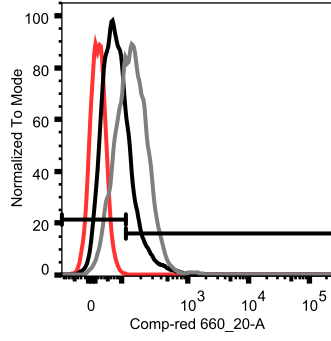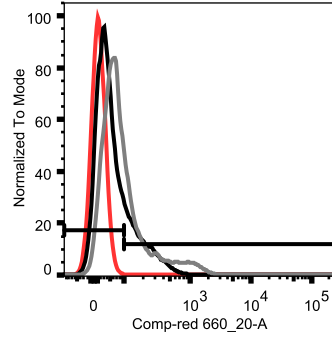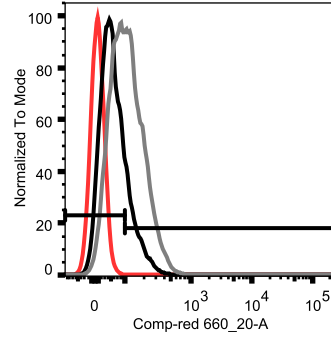

CD151

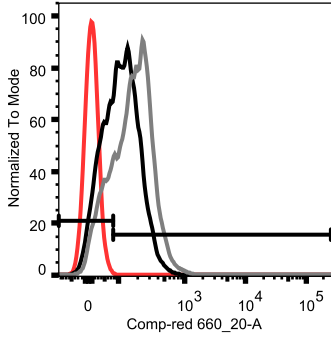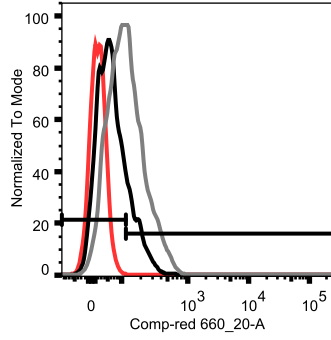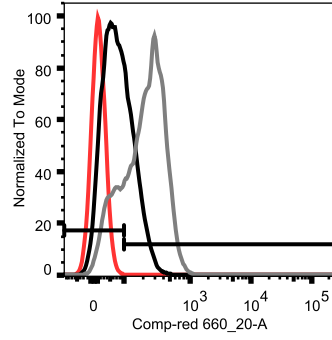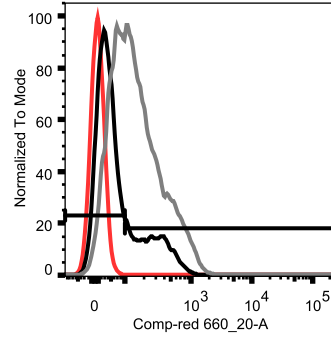

CD164

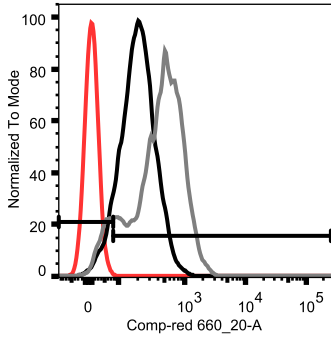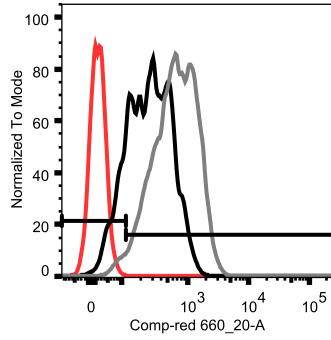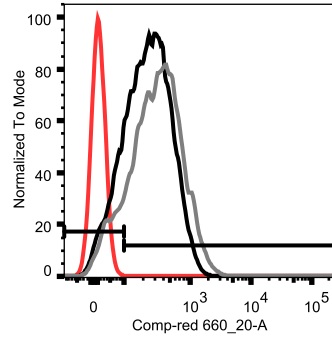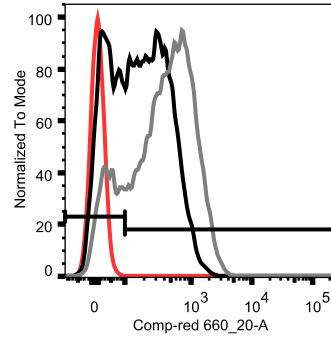

Basal

Luminal Progenitor

Mature Luminal

Stromal

CD166

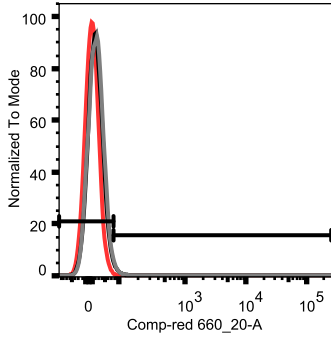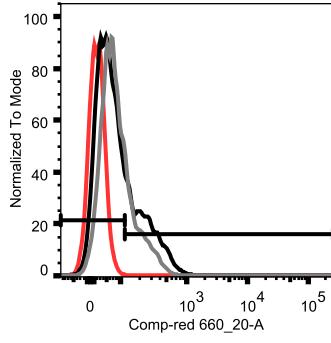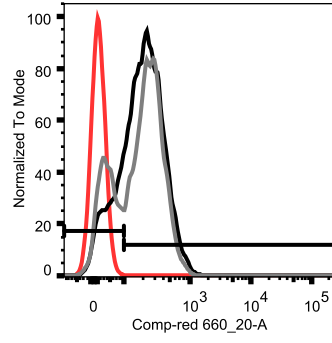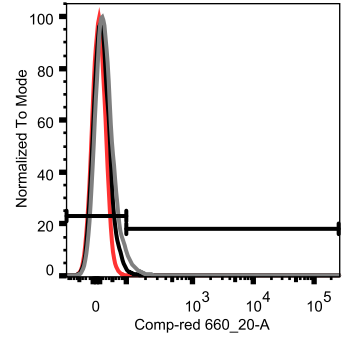

CD200

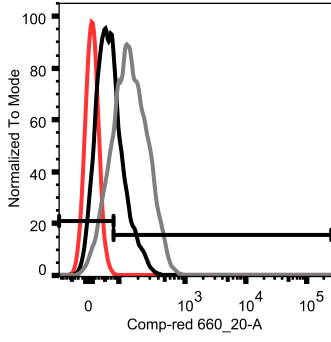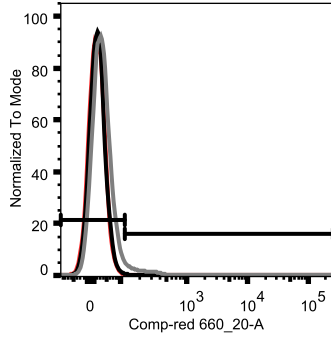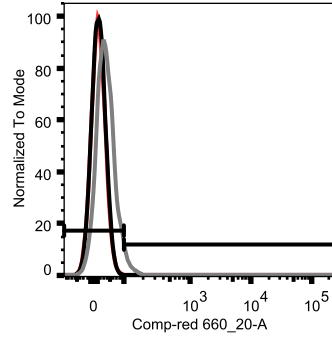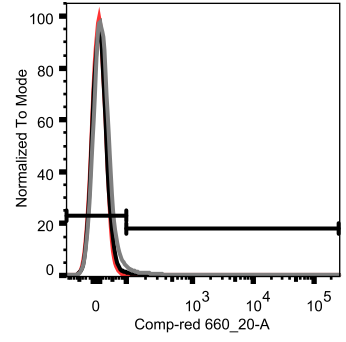

CD220

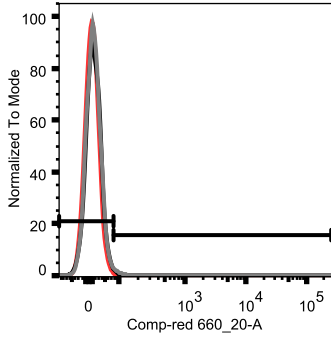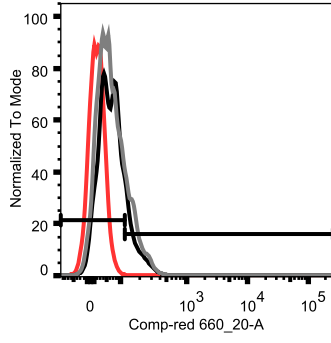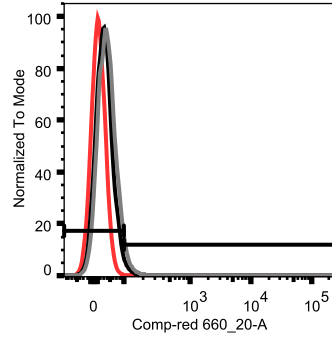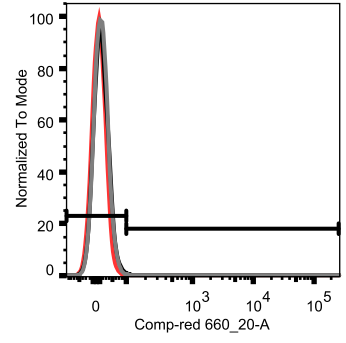

CD227

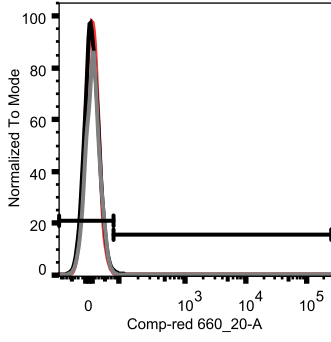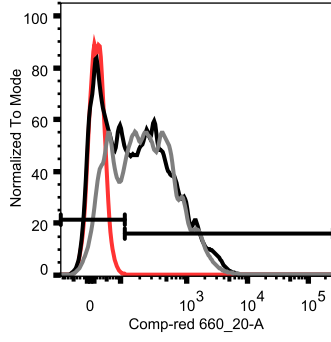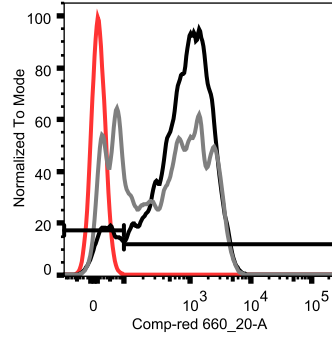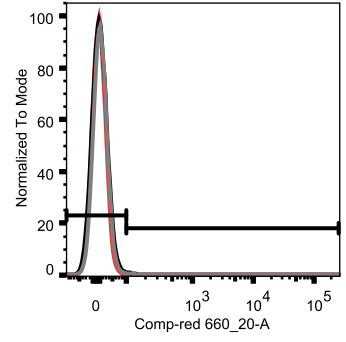

CD271

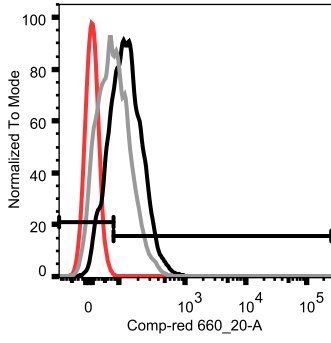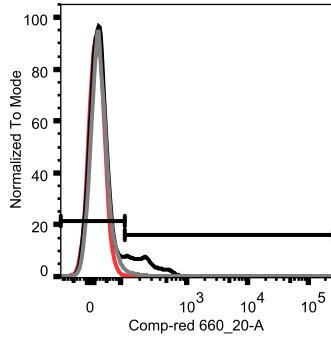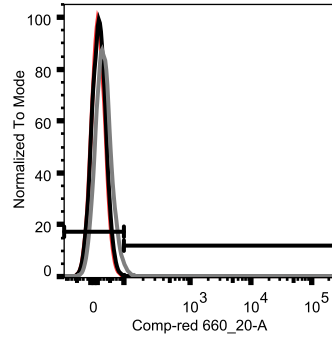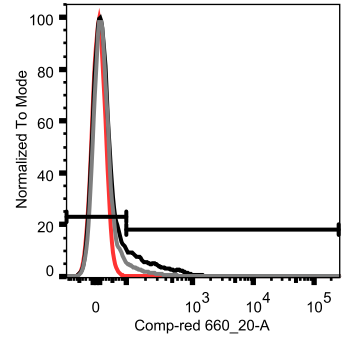

Basal

Luminal Progenitor

Mature Luminal

Stromal

CD282

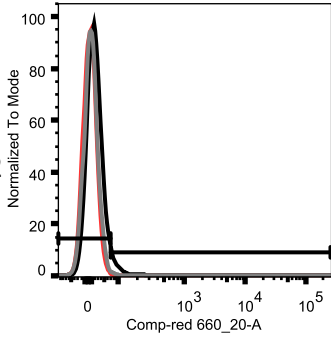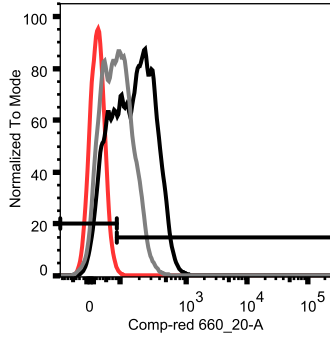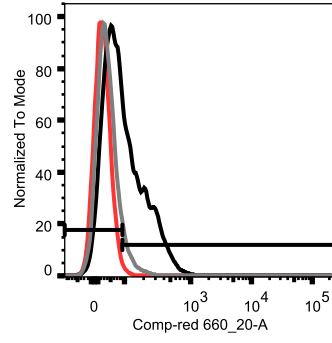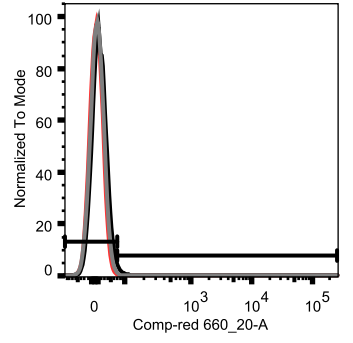

CD321

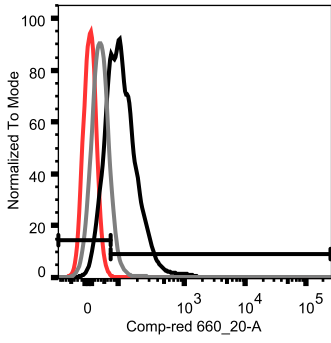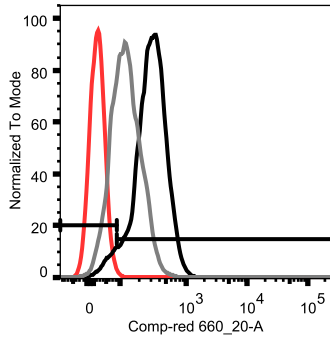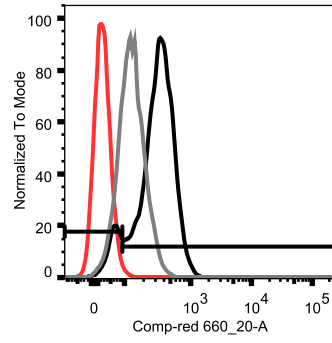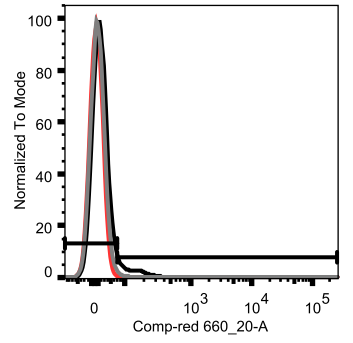

CD340

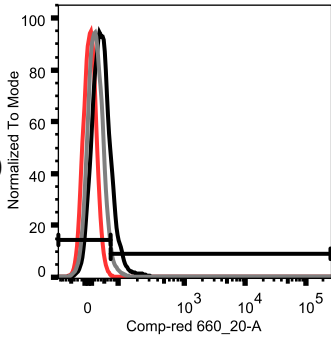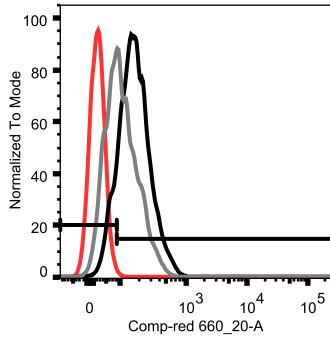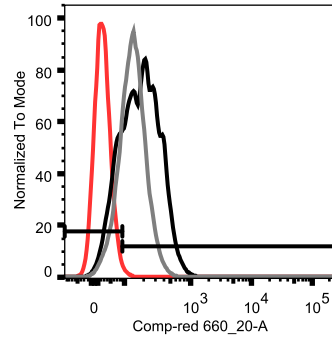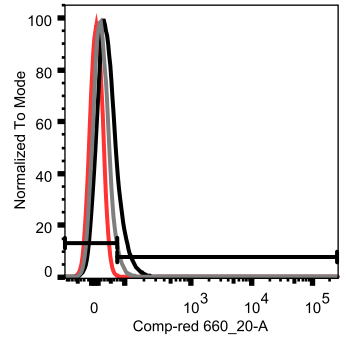

B2M

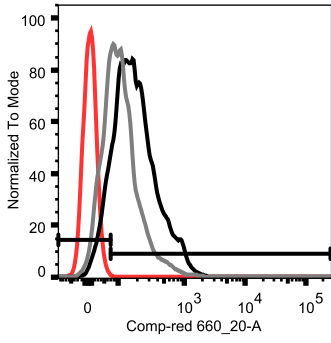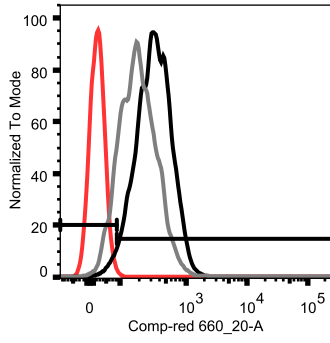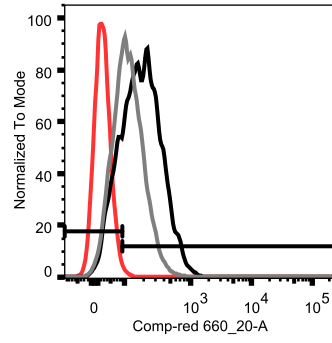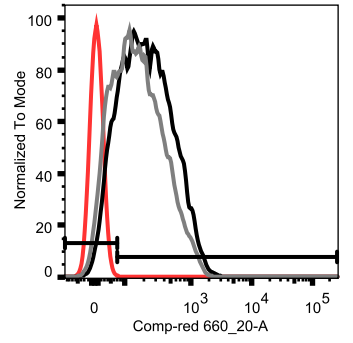

EGFR

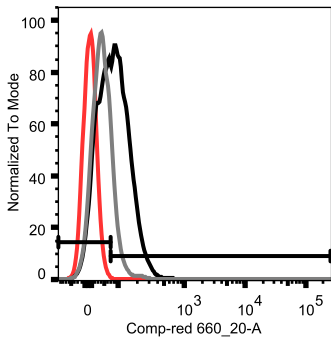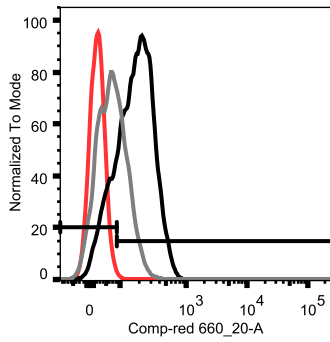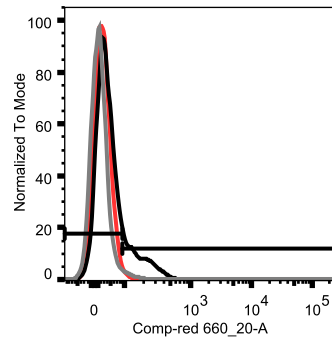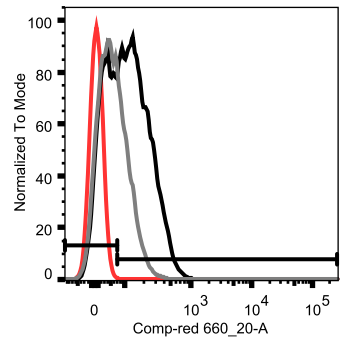

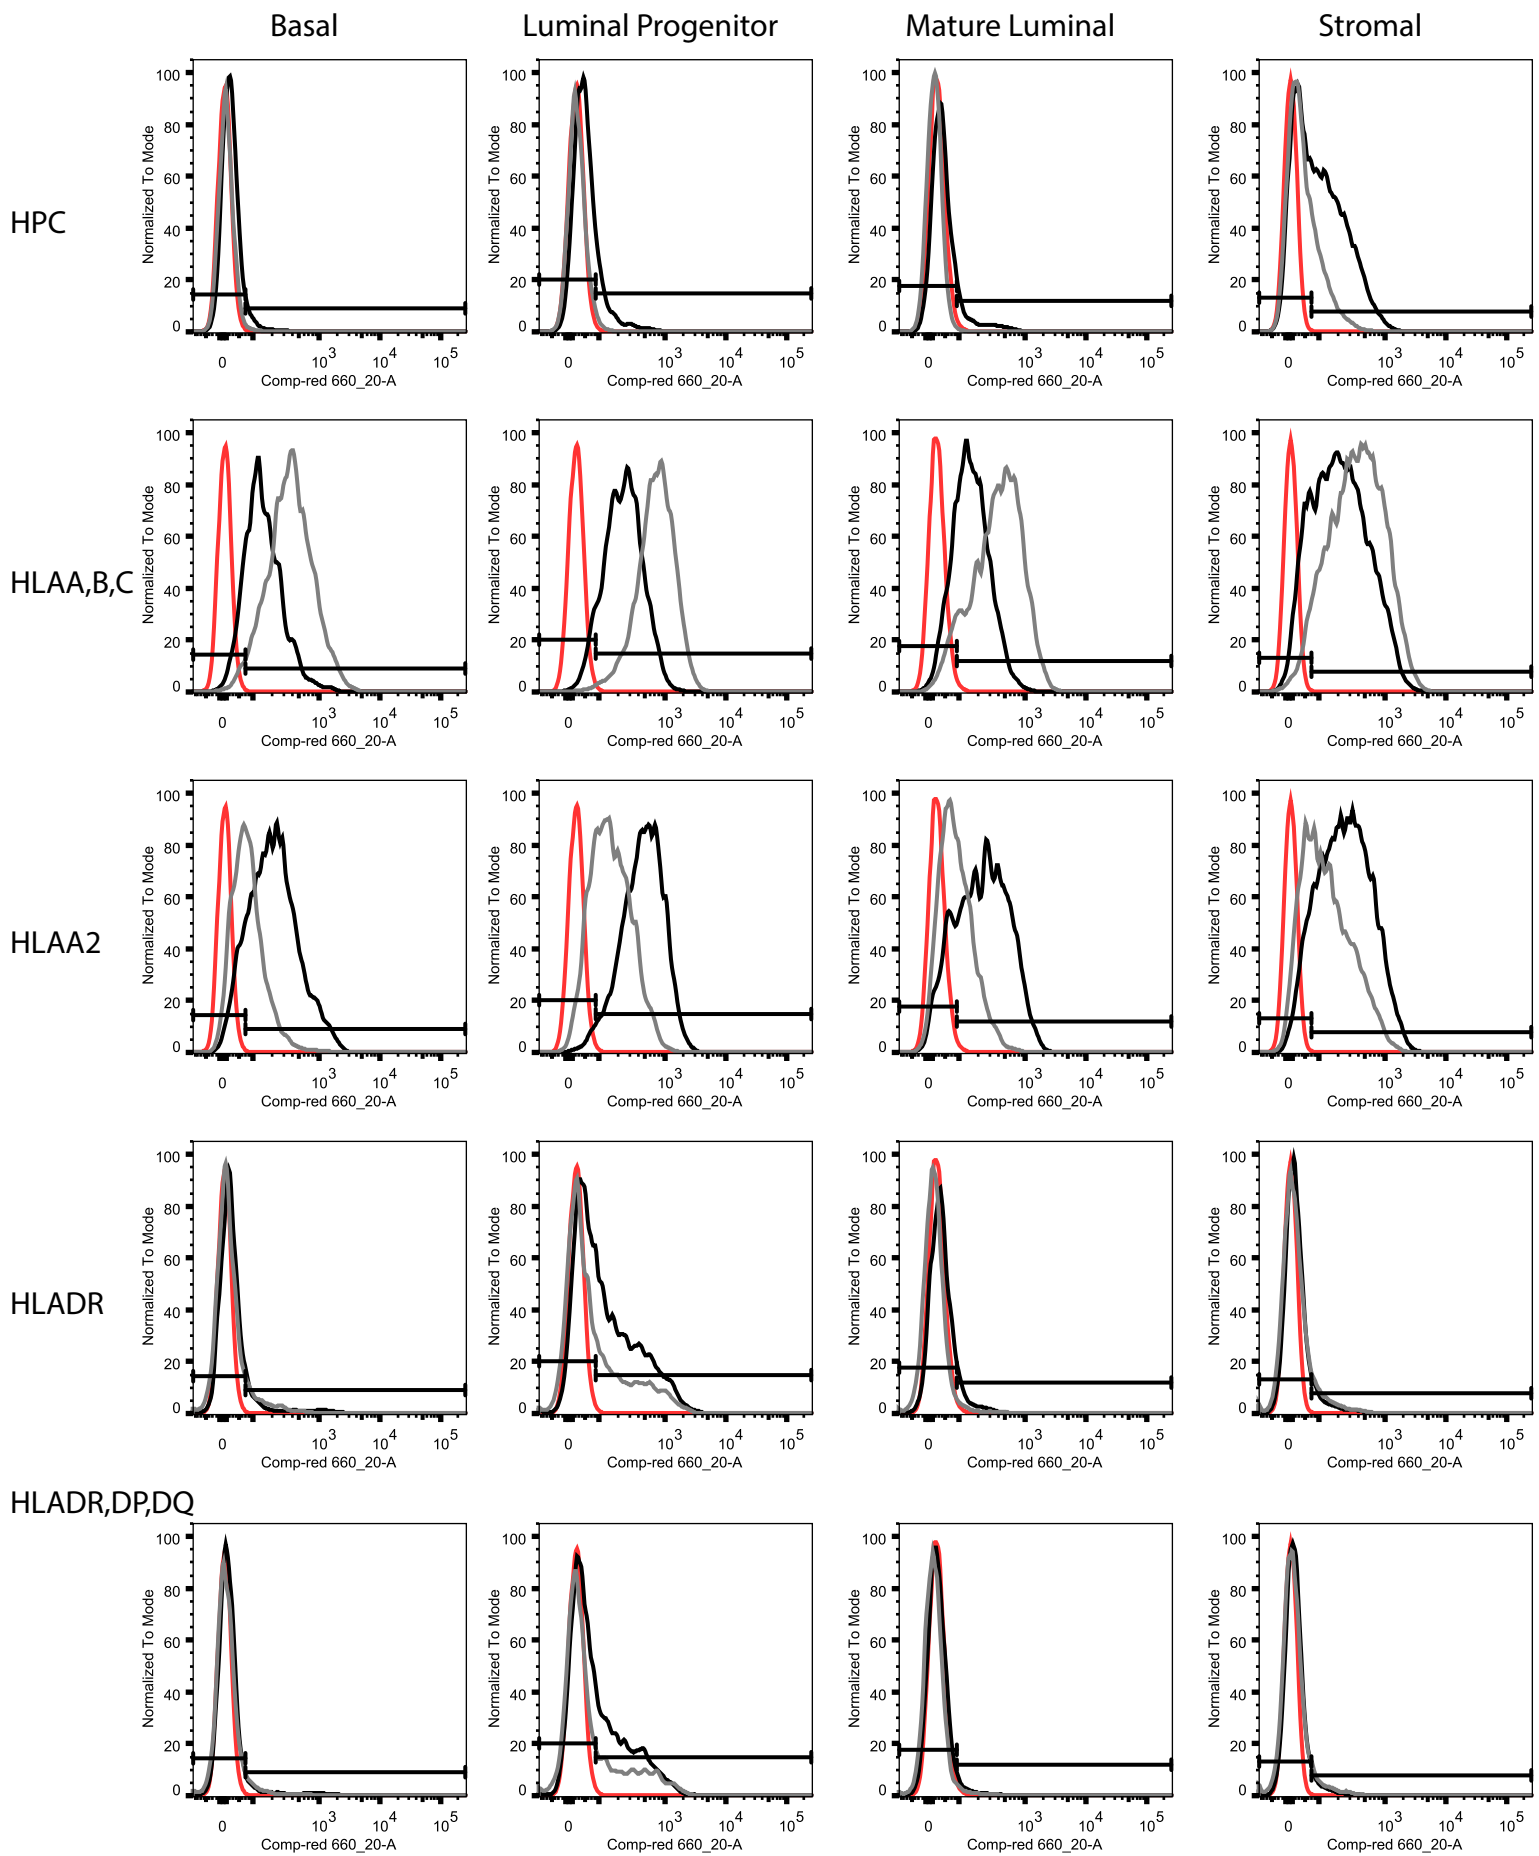

GD2

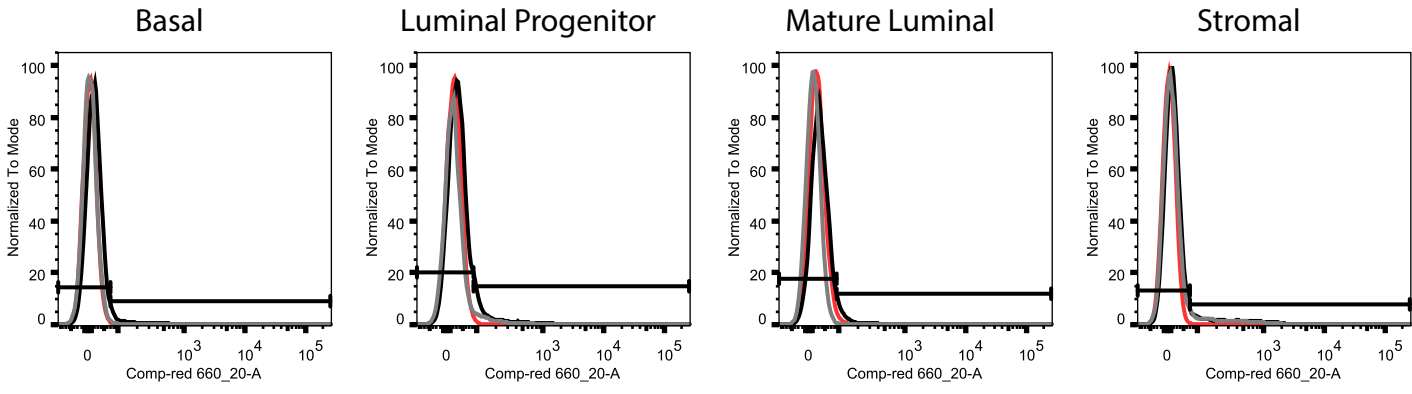

SSEA-1

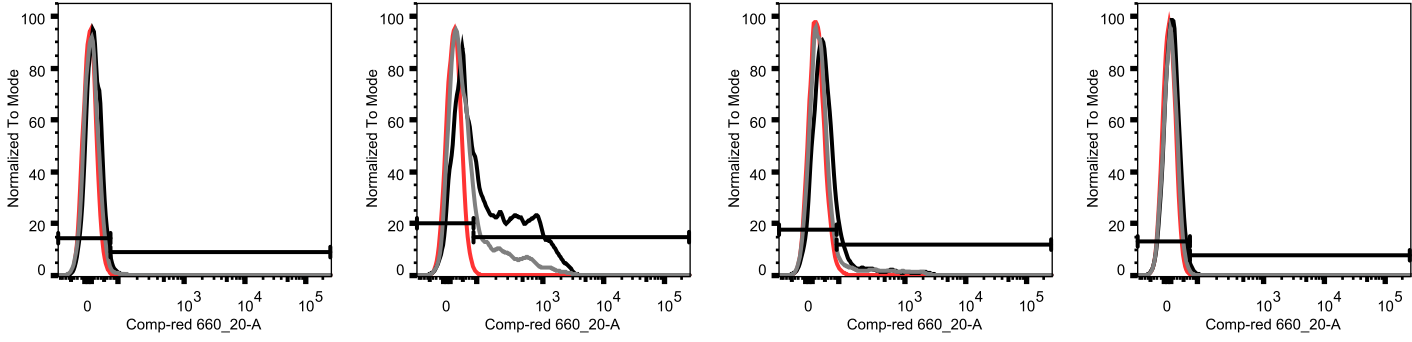

SSEA-4

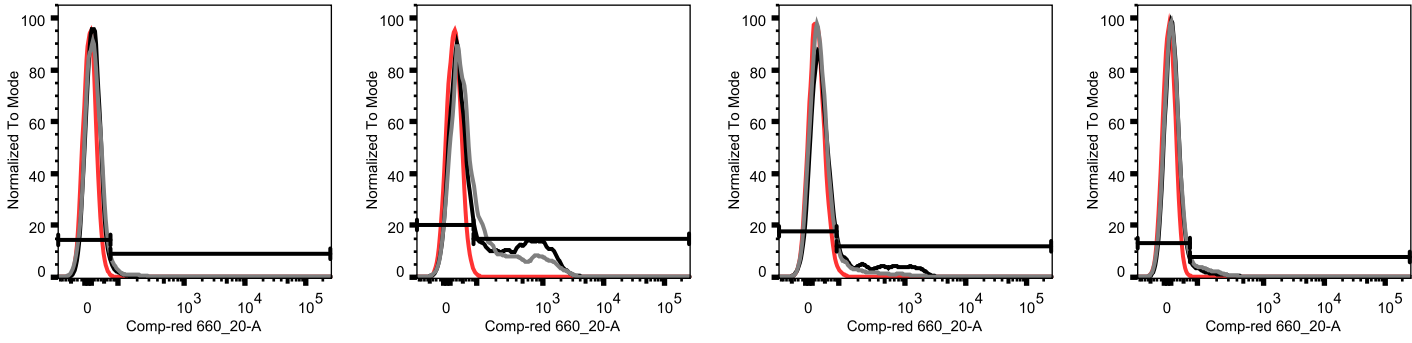

TRA-1-60

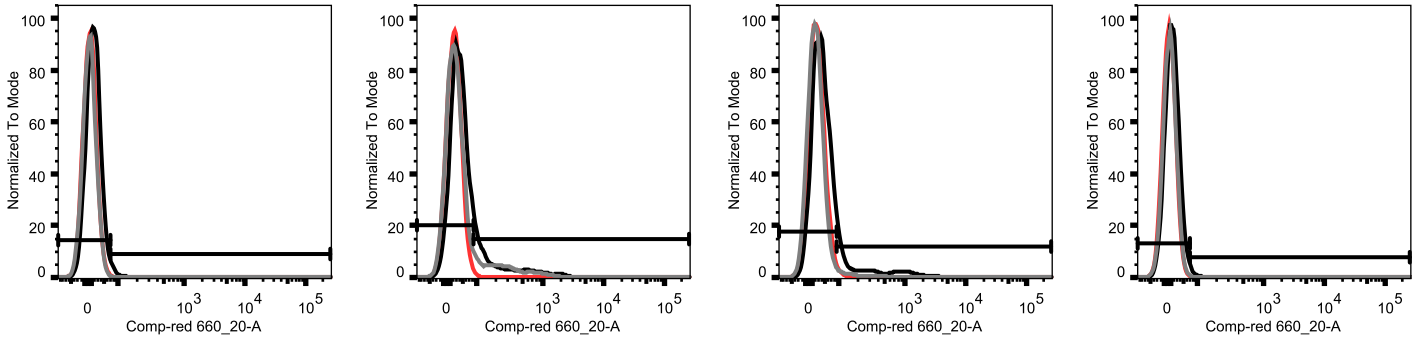

TRA-1-81

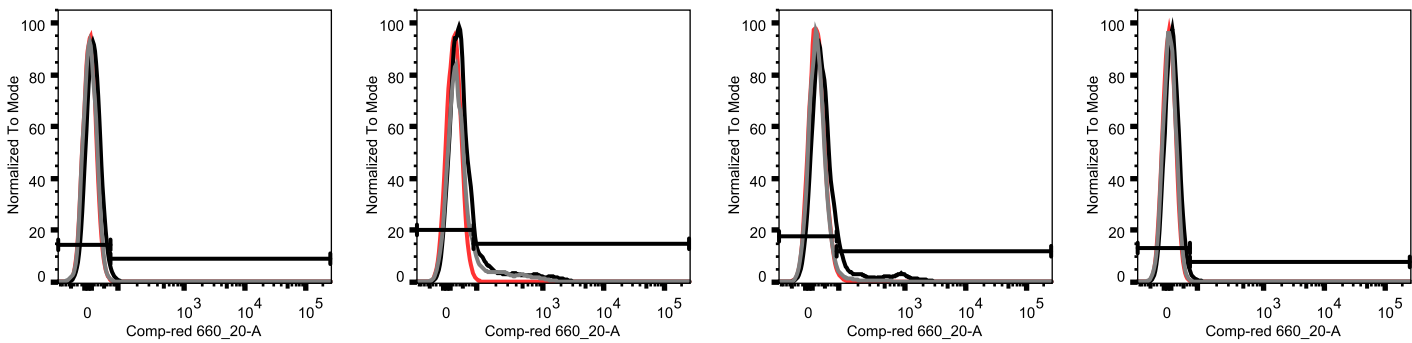

Basal

Luminal Progenitor

Mature Luminal

Stromal

CD104

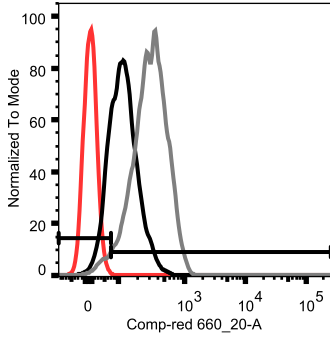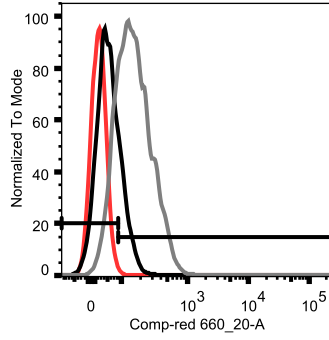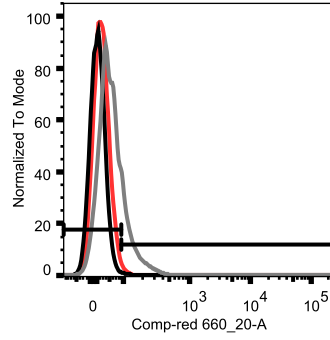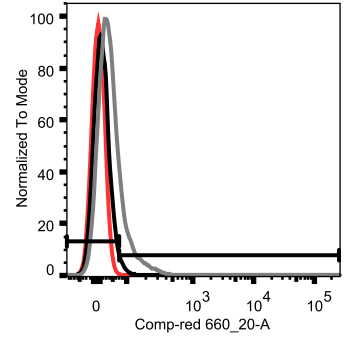

CD120b

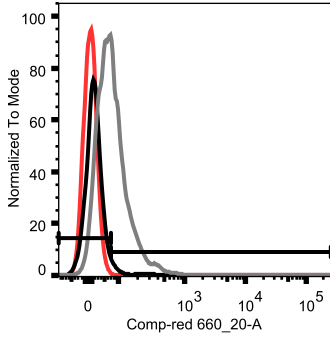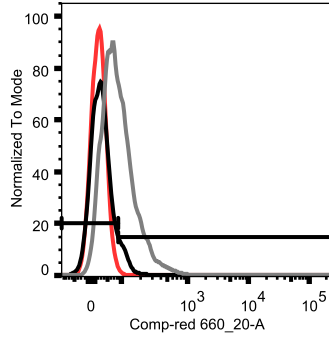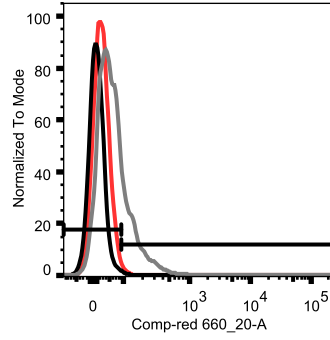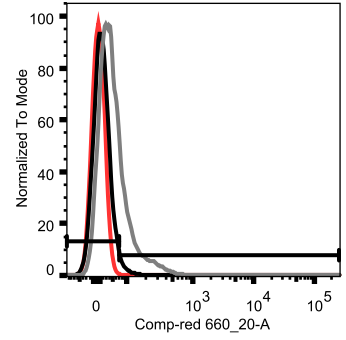

CD132

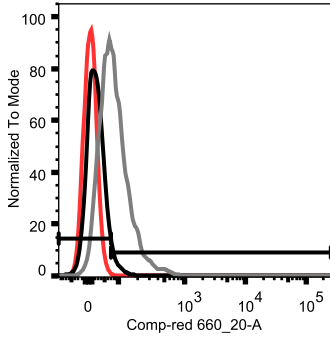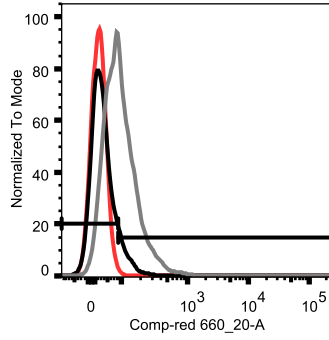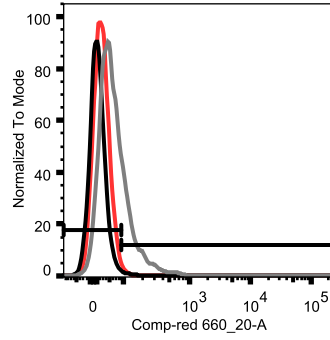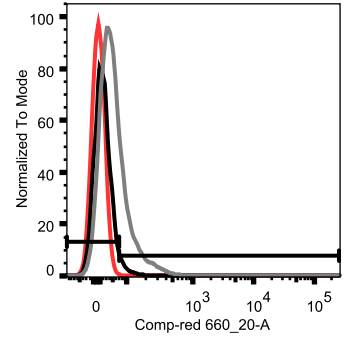

CD201

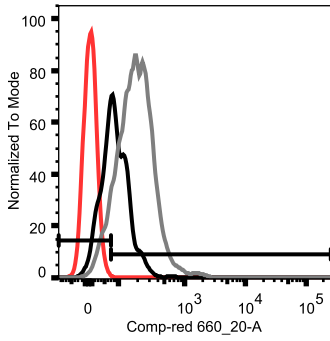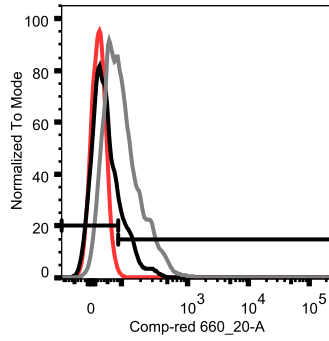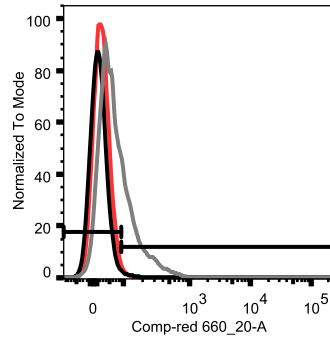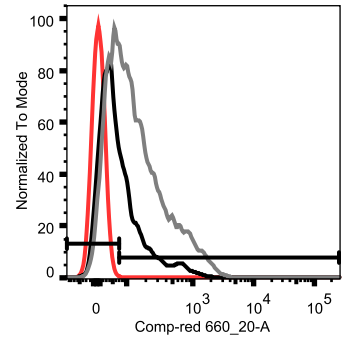

CD210

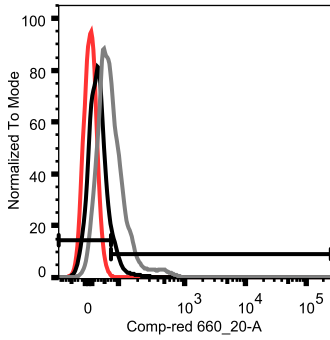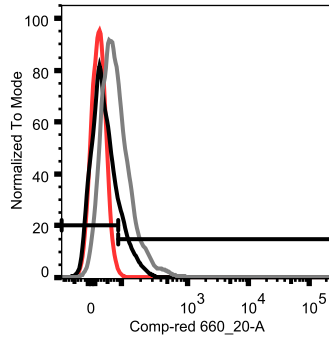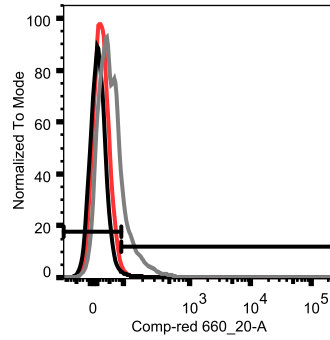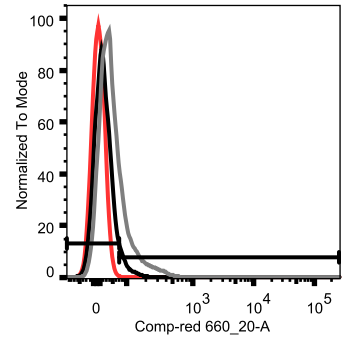

CLA

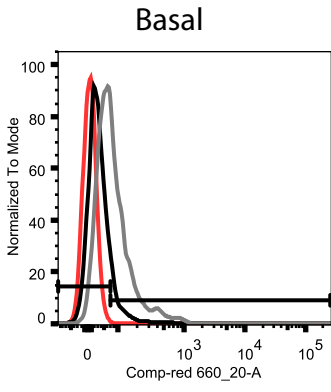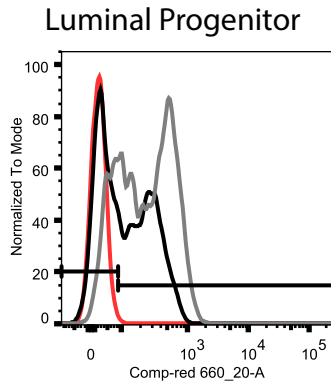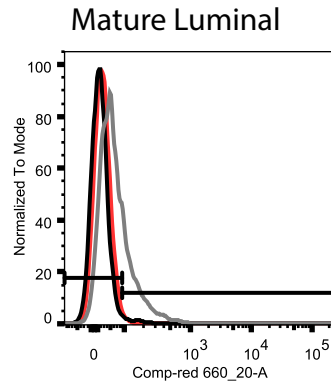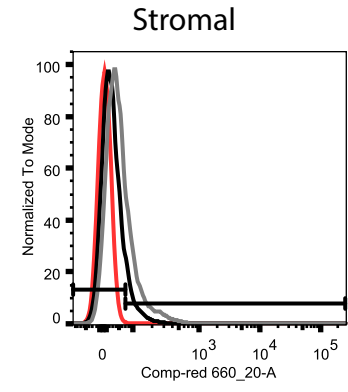

Integrin B7

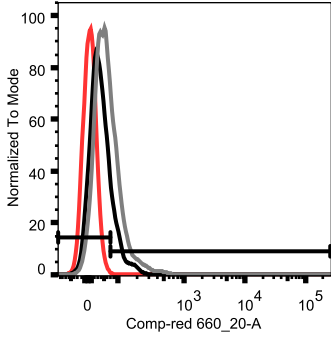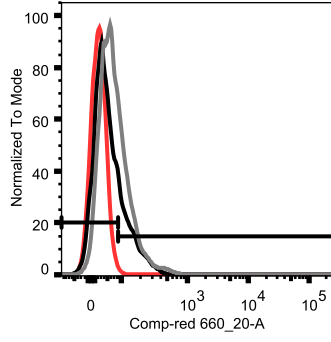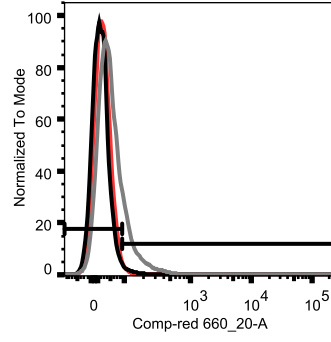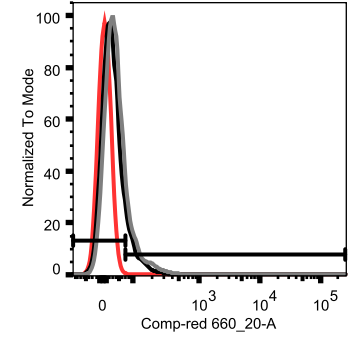

Supplement: MOESM3 [file 19255642]
