# Supplementary material for: High-throughput surface marker screen on primary human breast tissues reveals further cellular heterogeneity
Source: Springer Nature journal article supplement (doi:10.1186/s13058-021-01444-5), 2021-06-13
Supplement: MOESM2 [file 19255642]

A) **Live-Lin neg**

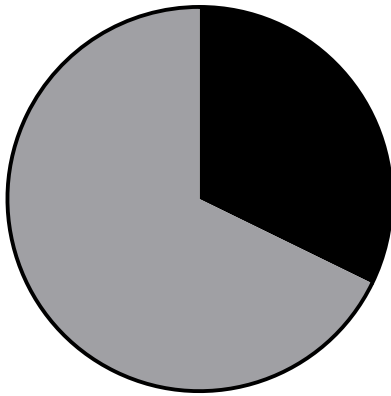

■ Positive Abs  
■ Negative Abs

B) **DAPI negative cells**

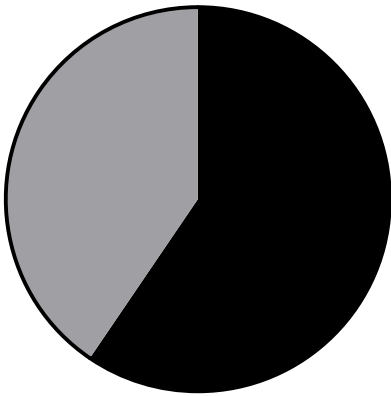

■ Positive Abs  
■ Negative Abs

C) **All events**

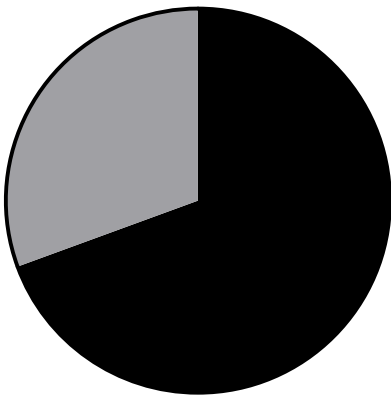

■ Positive Abs  
■ Negative Abs
