# Supplementary material for: High-throughput surface marker screen on primary human breast tissues reveals further cellular heterogeneity
Source: Springer Nature journal article supplement (doi:10.1186/s13058-021-01444-5), 2021-06-13

## Luminal

CD340

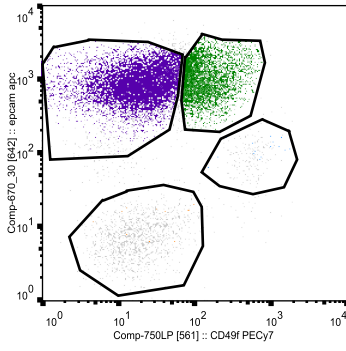

CD166

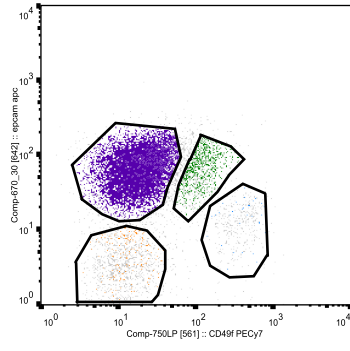

## Epithelial

CD66

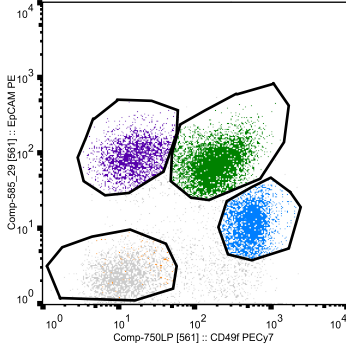

CD142

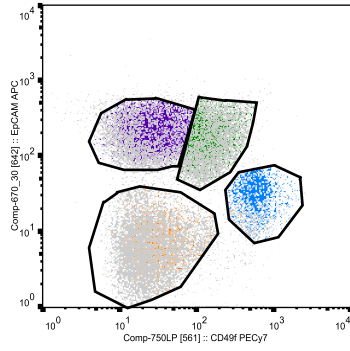

## All pops

CD55

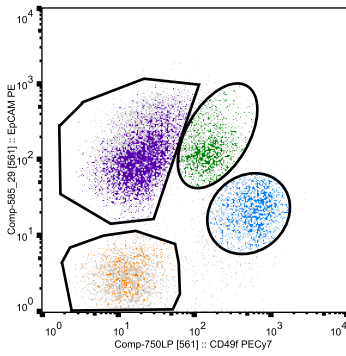

CD54

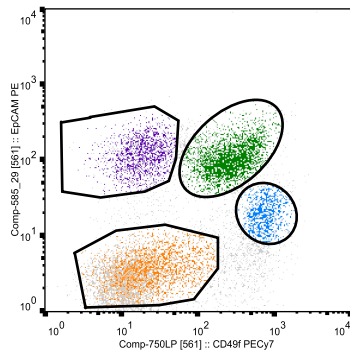

CD44

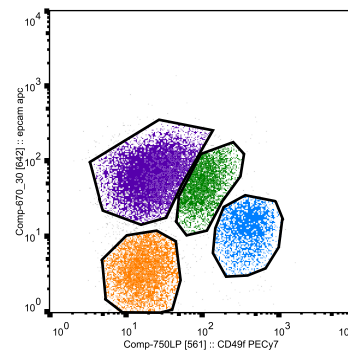

CD49c

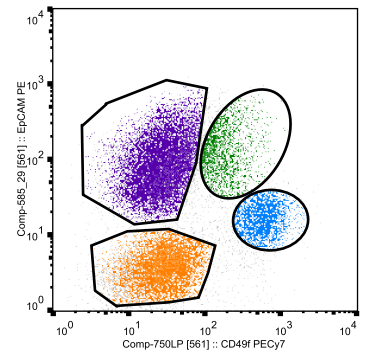

## Stromal

CD26

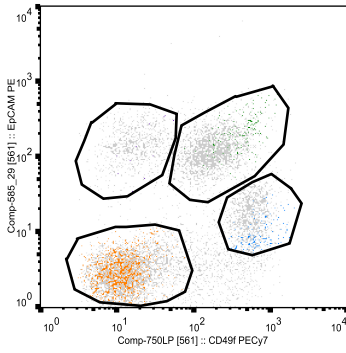

CD39

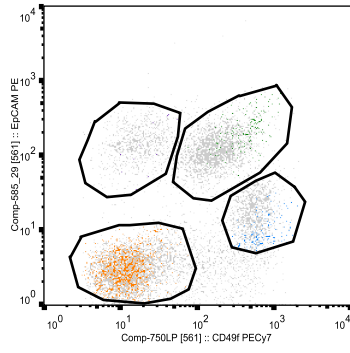

CD140b

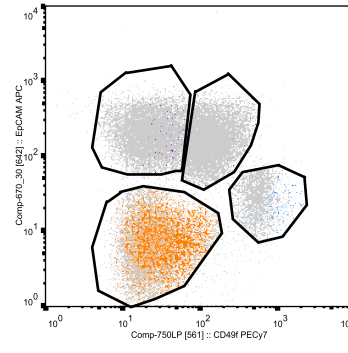

Supplement: MOESM4 [file 19255642]
