# Supplementary material for: High-throughput surface marker screen on primary human breast tissues reveals further cellular heterogeneity
Source: Springer Nature journal article supplement (doi:10.1186/s13058-021-01444-5), 2021-06-13

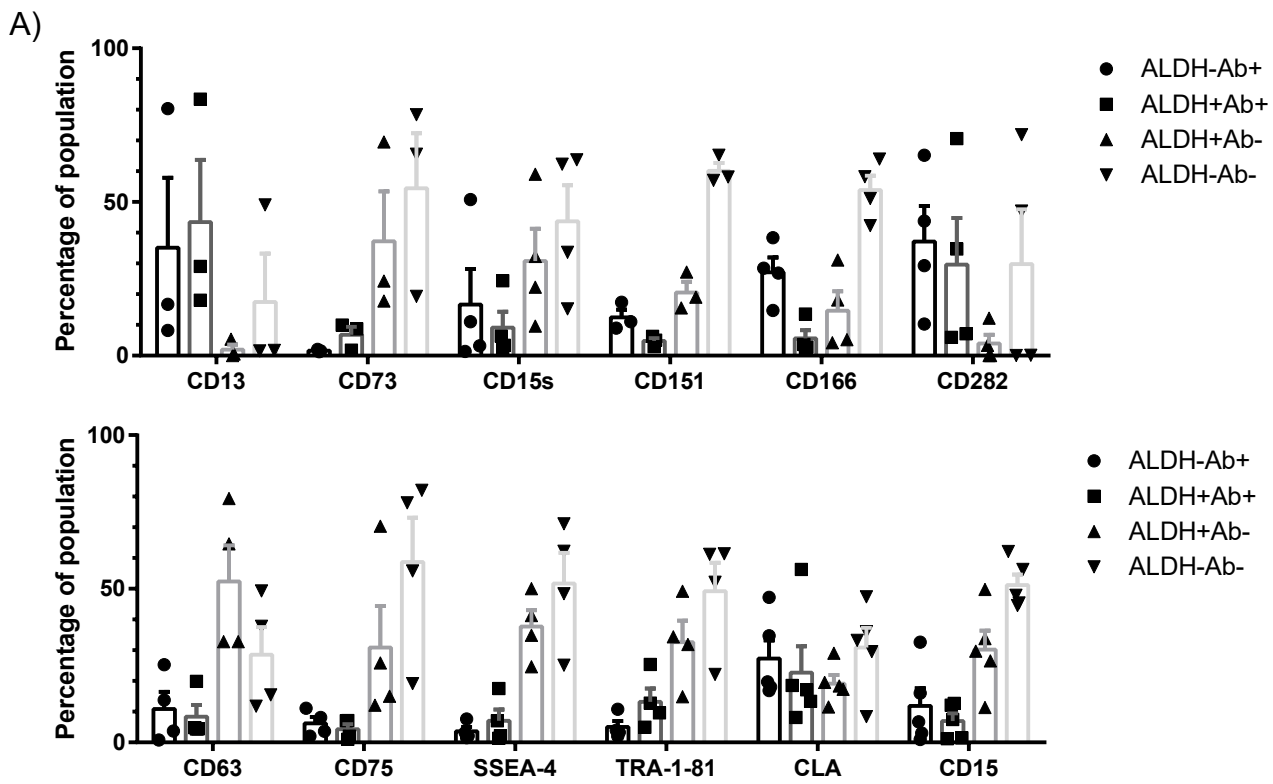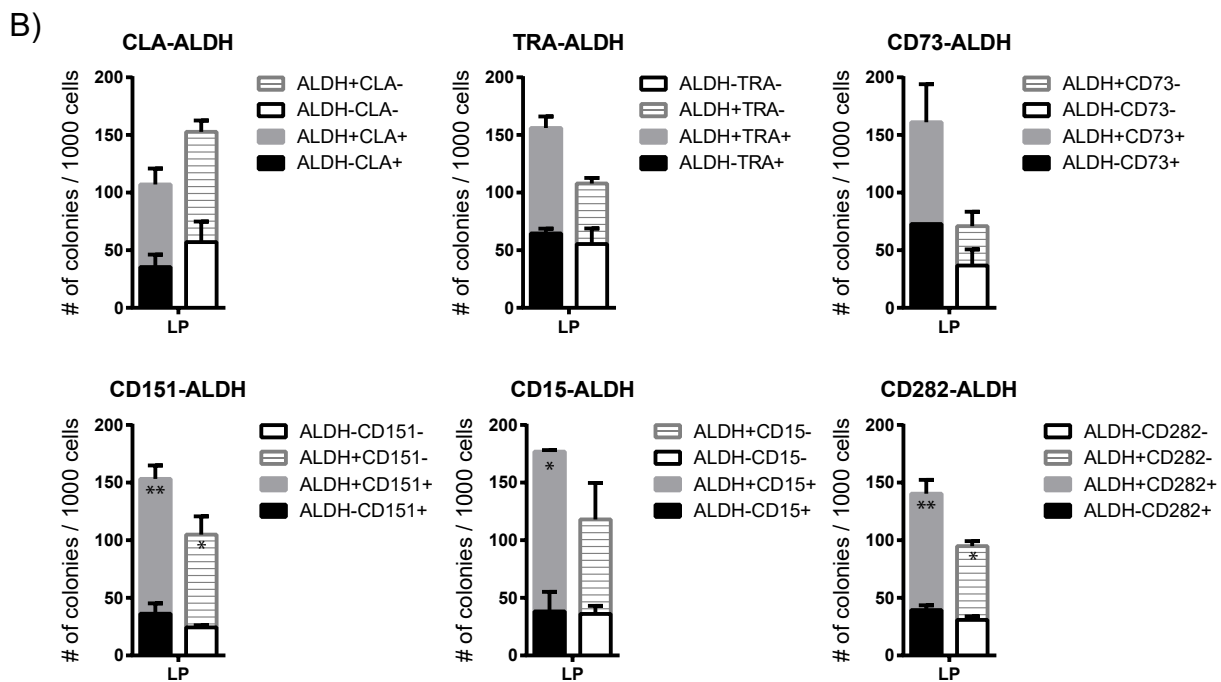

Supplement: MOESM5 [file 19255642]
